# Supplementary material for: Comparative Tumor RNA Sequencing Analysis for Difficult-to-Treat Pediatric and Young Adult Patients With Cancer
Source: PubMed Central journal article supplement (PMC6822083; doi:10.1001/jamanetworkopen.2019.13968), 2019-10-25
Supplement: jamanetwopen-2-e1913968-s001.pdf [file jamanetwopen-2-e1913968-s001.pdf]

## Supplementary Online Content

Vaske OM, Bjork I, Salama SR, et al. Comparative tumor RNA sequencing analysis for difficult-to-treat pediatric and young adult patients with cancer. *JAMA Netw Open*. 2019;2(10):e1913968. doi:10.1001/jamanetworkopen.2019.13968

**eMethods.** Supplemental Methods

**eTable 1.** Directly and Indirectly Actionable Genes Used to Prioritize Gene Expression Outlier Findings

**eTable 2.** Published Repository Data Sets Included in the Treehouse Reference Compendium v5

**eTable 3.** Findings From Comparative RNA-Seq Analysis and Comparisons to Mutation Analysis

**eFigure 1.** Treehouse Reference Compendium Used for Cross-Tumor Comparisons

**eFigure 2.** Treehouse Analysis of Sample TH03\_0288\_S01

**eReferences.**

This supplementary material has been provided by the authors to give readers additional information about their work.

## eMethods. Supplemental Methods

### Patient data transfer

We obtained raw RNA-Seq data from clinical partners using AWS via Amazon S3 and external hard drives. For BCCH, a Canadian institution, due to international regulations that limit the transfer of raw genomic information, we packaged our analysis pipelines into Docker containers ([www.docker.com](http://www.docker.com)) to ensure consistent reproducible execution of our process, and to alleviate the need to transfer raw data files internationally. The BCCH bioinformaticians ran the Docker-ized analysis pipeline on their servers and shared the resulting gene-level expression information (gene-level TPM) across the border.

### RNA sequencing analysis pipeline

The RNA sequencing (RNA-Seq) analysis pipelines can be obtained with the following docker command: `docker pull quay.io/ucsc_cgl/rnaseq-cgl-pipeline:3.2.1-1`. Gene expression quantification was performed as follows: Adapters were removed with CutAdapt v1.9. Reads were then aligned by STAR v2.4.2a using indices generated from the human reference genome GRCh38 and the human gene models GENCODE 23. RSEM Version 1.2.25 was used to quantify gene expression. Reference data sources: GRCh38 was downloaded from

[ftp://ftp.ncbi.nlm.nih.gov/genomes/archive/old\\_genbank/Eukaryotes/vertebrates\\_mammals/Homo\\_sapiens/GRCh38/seqs\\_for\\_alignment\\_pipelines/GCA\\_000001405.15\\_GRCh38\\_no\\_alt\\_analysis\\_set.fna.gz](ftp://ftp.ncbi.nlm.nih.gov/genomes/archive/old_genbank/Eukaryotes/vertebrates_mammals/Homo_sapiens/GRCh38/seqs_for_alignment_pipelines/GCA_000001405.15_GRCh38_no_alt_analysis_set.fna.gz) on July 22, 2016. GENCODE 23 was downloaded from

[ftp://ftp.sanger.ac.uk/pub/gencode/Gencode\\_human/release\\_23/gencode.v23.annotation.gtf.gz](ftp://ftp.sanger.ac.uk/pub/gencode/Gencode_human/release_23/gencode.v23.annotation.gtf.gz) July 22, 2016. The source code of the pipeline is available at <https://github.com/UCSC-Treehouse/pipelines>.

For quality assessment, the genome-aligned reads that are output by our RNA-Seq pipeline<sup>1</sup> were sorted by name using sambamba v0.6.1, piped to Sambaster 0.1.22 for duplicate marking and then sorted by coordinate by sambamba v0.6.1. The tools `geneBody_coverage.py` and `read_distribution.py` from RSeQC v2.7.10 were run on all BAM files.

A quality metric, the number of mapped, exonic, non-duplicate (MEND) reads, was estimated from `read_distribution.py` output using the script `parseReadDist.R` to do the following 1) Calculate the number of reads per tag (from the top table, "Total Reads"/"Total Tags") 2) Calculate the number of exonic tags (from the bottom table, the sum of the Tag\_count column for the rows "CDS\_Exons", "5'UTR\_Exons" and "3'UTR\_Exons"). 3) Estimate the number of MEND reads by multiplying and halving the two previously calculated numbers: "number of exonic tags" \* "number of reads per tag" /2. The QC process is available as a stand-alone docker image at [https://hub.docker.com/r/hbeale/treehouse\\_bam\\_qc/](https://hub.docker.com/r/hbeale/treehouse_bam_qc/). The source code is at [https://github.com/UCSC-Treehouse/bam\\_qc](https://github.com/UCSC-Treehouse/bam_qc).

### Datasets used for comparative RNA-Seq analysis

The RNA-Seq sample data with associated clinical metadata were managed using REDCap electronic data capture tools hosted at UCSC<sup>2</sup>. Version 5 of the Treehouse Gene Expression Reference Compendium, used in this manuscript, comprises 11,340 samples derived from TCGA (n=9806), TARGET (n=784), 17 additional public repository datasets (n=586) and 164 from our partner clinical sites (eTable 2). The gene expression compendium is publicly available through the UCSC Xena Browser at <https://treehousegenomics.ucsc.edu/p/vaske-2019-comparative-tumor-RNA>.

### Visualization of the reference compendium using TumorMap

To aid in the molecular classification of tumors, we used the previously published TumorMap method<sup>3</sup>. Briefly, we first computed pairwise Spearman correlations between RNA-Seq-derived gene expression profiles of the tumors in our reference cohort (n = 11,340). This produced a square correlation matrix with 11,340 columns and 11,340 rows. We initially measured the expression of 60,498 GENCODE 23 genes (58,581 of these had unique identifiers) and then filtered out 31,497 genes with low expression or variance from the original 60,498 for a final count of 27,084 genes retained for analysis. The correlation matrix is used as input for the TumorMap, which is available at <https://tumormap.ucsc.edu/?p=vaske-2019-comparative-tumor-RNA>.

### Defining similar tumors for pan-disease outlier analysis

To identify compendium tumor samples most similar to each index sample, TPM values from each of the 144 samples were used to compute Spearman correlations between the index sample and all the tumors in our compendium. We used the correlations of the index sample to the compendium to identify samples most similar to the index case. For each case we defined the most similar tumors in four ways: (1) all samples with the same histopathological classification as the index sample ("diagnosed disease"), (2) all

samples with a disease shared with the top six most correlated samples (MCS) (“inferred disease”), (3) all MCS with a correlation to the index sample in the top 5th percentile of all correlations in the compendium (first degree MCS) (“high stringency correlation”) and (4) all samples that are first degree MCS to the first degree MCS of the index samples (first and second degree MCS) (“low stringency correlation”). One hundred and thirty six samples (out of 144) shared a diagnosed disease with another sample in the compendium, and, as expected, for 129 of those 136 samples, the stringent correlation-based cohort included at least one sample with the diagnosed disease. In 119 of the 136, the stringent correlation-based cohort also included samples with other diseases, suggesting that comparative gene expression analysis can be useful for identifying tumors with similar expression signatures regardless of diagnoses. The cohorts of similar samples were used in the gene expression outlier analysis described below.

**eTable 1. Directly and indirectly actionable genes used to prioritize gene expression outlier findings.**

| Gene   | Category                       | Druggability                     | Available approved therapy                 |
|--------|--------------------------------|----------------------------------|--------------------------------------------|
| JAK1   | JAK/STAT                       | directly druggable gene          | ruxolitinib, tofacitinib                   |
| JAK2   | JAK/STAT                       | directly druggable gene          | ruxolitinib, tofacitinib                   |
| JAK3   | JAK/STAT                       | directly druggable gene          | tofacitinib                                |
| STAT1  | JAK/STAT                       | indirectly actionable gene (JAK) |                                            |
| STAT2  | JAK/STAT                       | indirectly actionable gene (JAK) |                                            |
| STAT3  | JAK/STAT                       | directly druggable gene          |                                            |
| STAT5A | JAK/STAT                       | indirectly actionable gene (JAK) |                                            |
| STAT5B | JAK/STAT                       | indirectly actionable gene (JAK) |                                            |
| IL6    | JAK/STAT                       | directly druggable gene          | siltuximab                                 |
| IL6R   | JAK/STAT                       | directly druggable gene          | tocilizumab                                |
| EGFR   | Receptor Tyrosine Kinase (RTK) | directly druggable gene          | cetuximab, erlotinib, afatinib, lapatinib  |
| ERBB2  | Receptor Tyrosine Kinase (RTK) | directly druggable gene          | afatinib, lapatinib                        |
| ERBB3  | Receptor Tyrosine Kinase (RTK) | directly druggable gene          | lapatinib                                  |
| ALK    | Receptor Tyrosine Kinase (RTK) | directly druggable gene          | crizotinib, ceritinib                      |
| MET    | Receptor Tyrosine Kinase (RTK) | directly druggable gene          | cabozantinib, crizotinib                   |
| ROS1   | Receptor Tyrosine Kinase (RTK) | directly druggable gene          | cabozantinib, crizotinib, ceritinib        |
| FLT1   | Receptor Tyrosine Kinase (RTK) | directly druggable gene          | pazopanib, regorafenib                     |
| FLT3   | Receptor Tyrosine Kinase (RTK) | directly druggable gene          | ponatinib, sorafenib, sunitinib            |
| KDR    | Receptor Tyrosine Kinase (RTK) | directly druggable gene          | sorafenib, sunitinib                       |
| FLT4   | Receptor Tyrosine Kinase (RTK) | directly druggable gene          | cabozantinib, axitinib                     |
| PDGFRA | Receptor Tyrosine Kinase (RTK) | directly druggable gene          | dasatinib, pazopanib, sorafenib            |
| PDGFRB | Receptor Tyrosine Kinase (RTK) | directly druggable gene          | dasatinib, pazopanib, sorafenib, sunitinib |
| FGFR1  | Receptor Tyrosine Kinase (RTK) | directly druggable gene          | pazopanib, panopanib, regorafenib          |
| KIT    | Receptor Tyrosine Kinase (RTK) | directly druggable gene          | imatinib, sunitinib, regorafenib           |
| CSF1R  | Receptor Tyrosine Kinase (RTK) | directly druggable gene          | pazopanib                                  |
| TEK    | Receptor Tyrosine Kinase (RTK) | directly druggable gene          |                                            |
| CDK4   | Cell Cycle                     | directly druggable gene          | palbociclib, ribociclib                    |
| CDK6   | Cell Cycle                     | directly druggable gene          | palbociclib, ribociclib                    |
| CCND1  | Cell Cycle                     | indirectly actionable gene (CDK) |                                            |
| CCND2  | Cell Cycle                     | indirectly actionable gene (CDK) |                                            |
| CCND3  | Cell Cycle                     | indirectly actionable gene (CDK) |                                            |
| CCNE1  | Cell Cycle                     | indirectly actionable gene (CDK) |                                            |
| CDK2   | Cell Cycle                     | directly druggable gene          |                                            |
| PIK3CA | PI3K/AKT/mTOR                  | directly druggable gene          | idelalisib                                 |
| PIK3CB | PI3K/AKT/mTOR                  | directly druggable gene          | idelalisib                                 |

| Gene      | Category             | Druggability                        | Available approved therapy         |
|-----------|----------------------|-------------------------------------|------------------------------------|
| PIK3CG    | PI3K/AKT/mTOR        | directly druggable gene             | idelalisib                         |
| PIK3CD    | PI3K/AKT/mTOR        | directly druggable gene             | idelalisib                         |
| PIK3R1    | PI3K/AKT/mTOR        | indirectly actionable gene (mTOR)   |                                    |
| PIK3R2    | PI3K/AKT/mTOR        | indirectly actionable gene (mTOR)   |                                    |
| PIK3R3    | PI3K/AKT/mTOR        | indirectly actionable gene (mTOR)   |                                    |
| PIK3R4    | PI3K/AKT/mTOR        | indirectly actionable gene (mTOR)   |                                    |
| PIK3R5    | PI3K/AKT/mTOR        | indirectly actionable gene (mTOR)   |                                    |
| PIK3R6    | PI3K/AKT/mTOR        | indirectly actionable gene (mTOR)   |                                    |
| PIK3C2A   | PI3K/AKT/mTOR        | indirectly actionable gene (mTOR)   |                                    |
| PIK3C2B   | PI3K/AKT/mTOR        | indirectly actionable gene (mTOR)   |                                    |
| PIK3C2G   | PI3K/AKT/mTOR        | indirectly actionable gene (mTOR)   |                                    |
| PIK3C3    | PI3K/AKT/mTOR        | indirectly actionable gene (mTOR)   |                                    |
| AKT1      | PI3K/AKT/mTOR        | indirectly actionable gene (mTOR)   |                                    |
| AKT3      | PI3K/AKT/mTOR        | indirectly actionable gene (mTOR)   |                                    |
| TSC1      | PI3K/AKT/mTOR        | indirectly actionable gene (mTOR)   |                                    |
| TSC2      | PI3K/AKT/mTOR        | indirectly actionable gene (mTOR)   |                                    |
| MTOR      | PI3K/AKT/mTOR        | directly druggable gene             | everolimus, temsirolimus           |
| RPTOR     | PI3K/AKT/mTOR        | indirectly actionable gene (mTOR)   |                                    |
| MLST8     | PI3K/AKT/mTOR        | indirectly actionable gene (mTOR)   |                                    |
| DEPTOR    | PI3K/AKT/mTOR        | indirectly actionable gene (mTOR)   |                                    |
| NRAS      | RAS/RAF/MEK          | indirectly actionable gene (MEK)    |                                    |
| KRAS      | RAS/RAF/MEK          | indirectly actionable gene (MEK)    |                                    |
| HRAS      | RAS/RAF/MEK          | indirectly actionable gene (MEK)    |                                    |
| BRAF      | RAS/RAF/MEK          | directly druggable gene             | dabrafenib                         |
| RAF1      | RAS/RAF/MEK          | directly druggable gene             | dabrafenib, sorafenib, regorafenib |
| ARAF      | RAS/RAF/MEK          | indirectly actionable gene (MEK)    |                                    |
| MAP2K1    | RAS/RAF/MEK          | directly druggable gene             | trametinib                         |
| MAP2K2    | RAS/RAF/MEK          | directly druggable gene             | trametinib                         |
| PTCH1     | Sonic Hedgehog (SHH) | indirectly actionable gene (SMO)    |                                    |
| GLI1      | Sonic Hedgehog (SHH) | indirectly actionable gene (SMO)    |                                    |
| SMO       | Sonic Hedgehog (SHH) | directly druggable gene             | vismodegib                         |
| BCL2      | BCL2/MDM2            | directly druggable gene             | venetoclax                         |
| BCL6      | BCL2/MDM2            | indirectly actionable gene (BCL2)   |                                    |
| MDM2      | BCL2/MDM2            | indirectly actionable gene (BCL2)   |                                    |
| HSP90AA1  | Heat Shock Proteins  | directly druggable gene             |                                    |
| HSP90AA2P | Heat Shock Proteins  | directly druggable gene/gene family |                                    |
| HSP90N    | Heat Shock Proteins  | directly druggable gene/gene family |                                    |
| HSP90AA2  | Heat Shock Proteins  | directly druggable gene/gene family |                                    |

| <b>Gene</b> | <b>Category</b>           | <b>Druggability</b>                 | <b>Available approved therapy</b> |
|-------------|---------------------------|-------------------------------------|-----------------------------------|
| HSP90AA6P   | Heat Shock Proteins       | directly druggable gene/gene family |                                   |
| HSP90AA3P   | Heat Shock Proteins       | directly druggable gene/gene family |                                   |
| HSP90AA4P   | Heat Shock Proteins       | directly druggable gene/gene family |                                   |
| HSP90AA5P   | Heat Shock Proteins       | directly druggable gene/gene family |                                   |
| HSP90AB1    | Heat Shock Proteins       | directly druggable gene/gene family |                                   |
| HSP90AB3P   | Heat Shock Proteins       | directly druggable gene/gene family |                                   |
| HSP90AB2P   | Heat Shock Proteins       | directly druggable gene/gene family |                                   |
| HSP90AB6P   | Heat Shock Proteins       | directly druggable gene/gene family |                                   |
| HSP90AB4P   | Heat Shock Proteins       | directly druggable gene/gene family |                                   |
| HSP90AB5P   | Heat Shock Proteins       | directly druggable gene/gene family |                                   |
| HSP90B1     | Heat Shock Proteins       | directly druggable gene/gene family |                                   |
| HSP90B2P    | Heat Shock Proteins       | directly druggable gene/gene family |                                   |
| HSP90B3P    | Heat Shock Proteins       | directly druggable gene/gene family |                                   |
| BTK         | B-cell receptor signaling | directly druggable gene/gene family | ibrutinib                         |
| MS4A1       | B-cell receptor signaling | directly druggable gene/gene family | rituximab                         |
| AURKA       | Aurora kinases            | directly druggable gene/gene family |                                   |
| AURKB       | Aurora kinases            | directly druggable gene/gene family |                                   |
| AURKC       | Aurora kinases            | directly druggable gene/gene family |                                   |
| PARP1       | DNA repair                | directly druggable gene/gene family | olaparib                          |

**eTable 2. Published repository datasets included in the Treehouse Compendium v5.**

**A. Compendium v5 Repository Data**

| TH dataset            | Accession       | Repository | Project                | Disease                     | N      |
|-----------------------|-----------------|------------|------------------------|-----------------------------|--------|
| TARGET                | TARGET          | dbGap      | TARGET                 | multiple cancers            | 784    |
| TCGA                  | TCGA            | dbGap      | TCGA                   | multiple cancers            | 9,806  |
| THR08                 | EGAD00001001098 | EGA        | St Jude PCGP           | ALL with MLL rearrangements | 63     |
| THR09                 | EGAD00001000356 | EGA        | ICGC                   | B-cell lymphoma             | 23     |
| THR10                 | EGAD00001002680 | EGA        | St Jude PCGP           | adrenocortical carcinoma    | 15     |
| THR11                 | EGAD00001001666 | EGA        | St Jude PCGP           | low grade glioma            | 32     |
| THR13                 | phs000900.v1.p1 | dbGap      | PBTC (Monje Lab)       | DIPG                        | 10     |
| THR14                 | CBTTC_HGG_PA_01 | Cavatica   | CBTTC                  | high grade glioma           | 29     |
| THR15                 | phs000699.v1.p1 | dbGap      | Perry et al            | osteosarcoma                | 29     |
| THR17                 | EGAD00001000158 | EGA        | ICGC/MAGIC             | medulloblastoma             | 17     |
| THR18                 | EGAD00001000328 | EGA        | ICGC                   | medulloblastoma             | 6      |
| THR19                 | EGAD00001000617 | EGA        | ICGC                   | pilocytic astrocytoma       | 69     |
| THR20                 | EGAD00001001620 | EGA        | ICGC                   | medulloblastoma             | 39     |
| THR22                 | EGAD00001000648 | EGA        | ICGC                   | germinal B-cell lymphoma    | 24     |
| THR25                 | EGAD00001000826 | EGA        | ICGC                   | osteosarcoma                | 7      |
| THR28                 | SRP040454       | SRA        | Kohsaka et al          | rhabdomyosarcoma            | 3      |
| THR29                 | phs000720.v2.p1 | dbGap      | Shern et al            | rhabdomyosarcoma            | 83     |
| THR30                 | phs000768.v2.p1 | dbGap      | Brohl et al            | Ewing sarcoma               | 62     |
| THR31                 | phs000673.v2.p1 | dbGap      | Peds Mi-OncoSeq/Met500 | multiple cancers            | 75     |
| total                 |                 |            |                        |                             | 11,176 |
| total - (TCGA+TARGET) |                 |            |                        |                             | 586    |

**B. Compendium v5 Treehouse Partner Data**

| TH dataset | Treehouse Partner                                                      | N   |
|------------|------------------------------------------------------------------------|-----|
| TH02       | Pacific Pediatric Neuro-Oncology Consortium (PNOC)                     | 29  |
| TH03       | Stanford, Sweet-Cordero Lab                                            | 73  |
| TH04       | Memorial Sloan Kettering Cancer Center via Stanford, Sweet-Cordero Lab | 1   |
| TH06       | British Columbia Personalized Onco-Genomics (POG) Program              | 31  |
| TH26       | Stanford, Merker Lab                                                   | 6   |
| TH27       | UC San Francisco, Sweet-Cordero Lab                                    | 24  |
| total      |                                                                        | 164 |

### C. Compendium v5 Repository Data By Consortium

| Consortium   | v5 (Feb 2018) |
|--------------|---------------|
| TCGA         | 9,806         |
| TARGET       | 784           |
| ICGC         | 168           |
| ICGC/MAGIC   | 17            |
| St Jude PCGP | 110           |
| CBTTC        | 29            |
| PBTC         | 10            |
| other        | 252           |
| total        | 11,176        |

### D. Repository Data Acknowledgments

Treehouse expression dataset (v5, February 2018)

Use of data available in public repositories allowed us to increase the number of pediatric cancer patients and pediatric cancer types included in our reference compendium, and we gratefully acknowledge the following data providers in the manner they have specified:

"International Cancer Genome Consortium. The following ICGC datasets were used in this work: EGAD00001000158, EGAD00001001620, EGAD00001000328, EGAD00001000648, EGAD00001000617, EGAD00001000826 and EGAD00001000356."

"St. Jude Children's Research Hospital – Washington University Pediatric Cancer Genome Project. The following datasets were accessed via EGA ( <https://www.ebi.ac.uk/ega/> ) and were used by permission:

EGAD00001001098: Andersson AK, Ma J, Wang J, et al. The landscape of somatic mutations in infant MLL-rearranged acute lymphoblastic leukemias. *Nat Genet.* 2015;47(4):330-7. (PMC4553269).

EGAD00001001666: Qaddoumi I, Orisme W, Wen J, et al. Genetic alterations in uncommon low-grade neuroepithelial tumors: BRAF, FGFR1, and MYB mutations occur at high frequency and align with morphology. *Acta Neuropathol.* 2016;131(6):833-45. (PMID 26810070).

EGAD00001002680: Pinto EM, Chen X, Easton J, et al. Genomic landscape of paediatric adrenocortical tumours. *Nat Commun.* 2015;6:6302. (PMC4352712)."

"Provider(s) of the data under accession phs000178.v10.p8 at dbGap. The Cancer Genome Atlas Research Network

National Cancer Institute and National Human Genome Research Institute, Bethesda, MD, USA

The results published here are in whole or part based upon data generated by The Cancer Genome Atlas managed by the NCI and NHGRI. Information about TCGA can be found at <http://cancergenome.nih.gov/>."

"Provider(s) of the data under accession phs000178.v10.p8 at dbGap: The Therapeutically Applicable Research to Generate Effective Treatments (TARGET) initiative managed by the NCI. The data used for this analysis are available at dbGap under accession phs000218. Information about TARGET can be found at <http://ocg.cancer.gov/programs/target>.



Children's Oncology Group (COG; Tissues for TARGET are collected as part of COG clinical and biological protocols)

Peter C. Adamson, MD. Children's Hospital of Philadelphia, Philadelphia, PA, USA

Principal Investigator (ALL Project Team)

Stephen P. Hunger, MD. University of Colorado Cancer Center, Denver, CO, USA

Principal Investigators (AML Project Team)

Soheil Meshinchi, MD, PhD. Fred Hutchinson Cancer Research Center, Seattle, WA, USA

Robert Arceci, MD, PhD. Children's Hospital, Phoenix, AZ, USA

Principal Investigator (NBL Project Team)

John M. Maris, MD. Children's Hospital of Philadelphia, Philadelphia, PA, USA

Robert Seeger, MD. Children's Hospital of Los Angeles, Los Angeles, CA, USA

Javed Khan, MD. National Cancer Institute, National Institutes of Health, Bethesda, MD, USA

Principal Investigator (OS Project Team)

Ching Lau, MD, PhD. Texas Children's Hospital, Houston, TX, USA

Paul Meltzer, MD, PhD. National Cancer Institute, National Institutes of Health, Bethesda, MD, USA

Principal Investigator (Kidney Project Teams - WT, CCSK, RT)

Elizabeth J. Perlman, MD. Ann and Robert H. Lurie Children's Hospital of Chicago, Chicago, IL, USA

Principal Investigator (Cell Lines and Xenografts - PPTP)

Peter Houghton, PhD. The Research Institute at Nationwide Children's Hospital, Columbus, OH, USA"

Provider(s) of the data under accession phs000699.v1.p1 at dbGap: Todd Golub. Dana Farber Cancer Institute, Boston, MA, USA. This work was conducted as part of the Slim Initiative for Genomic Medicine in the Americas (SIGMA), a project funded by the Carlos Slim Health Institute in Mexico.

Provider(s) of the data under accession phs000900.v1.p1 at dbGap: Charles Keller. Children's Cancer Therapy Development Institute, Fort Collins, CO, USA. We thank the many patients and families who selflessly contributed to this study through tissue donations from surgery or autopsy and Amar Gajjar, for his guidance and vision throughout this study. We also thank Darren Hargrave, James Olson and Sarah Leary for selection of V.2 chemical screen agents. We are grateful for the critical questions and comments by Simone Cheetham and Nadim Nsouli. We also acknowledge important comments by other DIPG Preclinical Consortium member Oren Becher. We thank Gerald Grant for assistance in developing rodent CED techniques. Short read sequencing was performed by the OHSU Massively Parallel Sequencing Shared Resource. The first paper using this data was: Grasso CS, Tang Y, Truffaux N, et al. Functionally defined therapeutic targets in diffuse intrinsic pontine glioma. *Nat Med.* 2015;21(6):555-9. (PMID 25939062).

Provider(s) of the data under accession phs000720.v2.p1 at dbGap: Javed Khan, MD. National Institutes of Health, Bethesda, MD, USA. The authors thank the Children's Oncology Group Soft Tissue Sarcoma Committee and the BioPathology Center, for their careful collection of clinical samples. This research was supported by the Intramural Research Program of the National Institute of Health and National Cancer Institute.

Provider(s) of the data under accession phs000768.v2.p1 at dbGap. Javed Khan, MD. National Institutes of Health, Bethesda, MD, USA. This research was supported by the Intramural Research Program of the National Institute of Health and National Cancer Institute. The datasets have been accessed through the NIH database for Genotypes and Phenotypes (dbGaP) under accession # phs000768.v1.p1.

Provider(s) of the data under accession phs000673.v2.p1 at dbGap. Arul Chinnaiyan, MD PhD. Michigan Center for Translational Pathology, University of Michigan, MI, USA. The results published here are in whole or part based upon data generated by the Clinical Sequencing Exploratory Research (CSER) consortium

established by the NHGRI. Funding support was provided through cooperative agreements with the NHGRI and NCI through grant numbers U01 HG006508 (Exploring Cancer Medicine for Sarcoma and Rare Cancers). Information about CSER and the investigators and institutions who comprise the CSER consortium can be found at <http://www.genome.gov/27546194>

Provider(s) of the data under accession SRP040454 at SRA. Dataset was made available by Memorial Sloan Kettering Cancer Center.

This research was conducted using data made available by The Children’s Brain Tumor Tissue Consortium (CBTTC).

a.

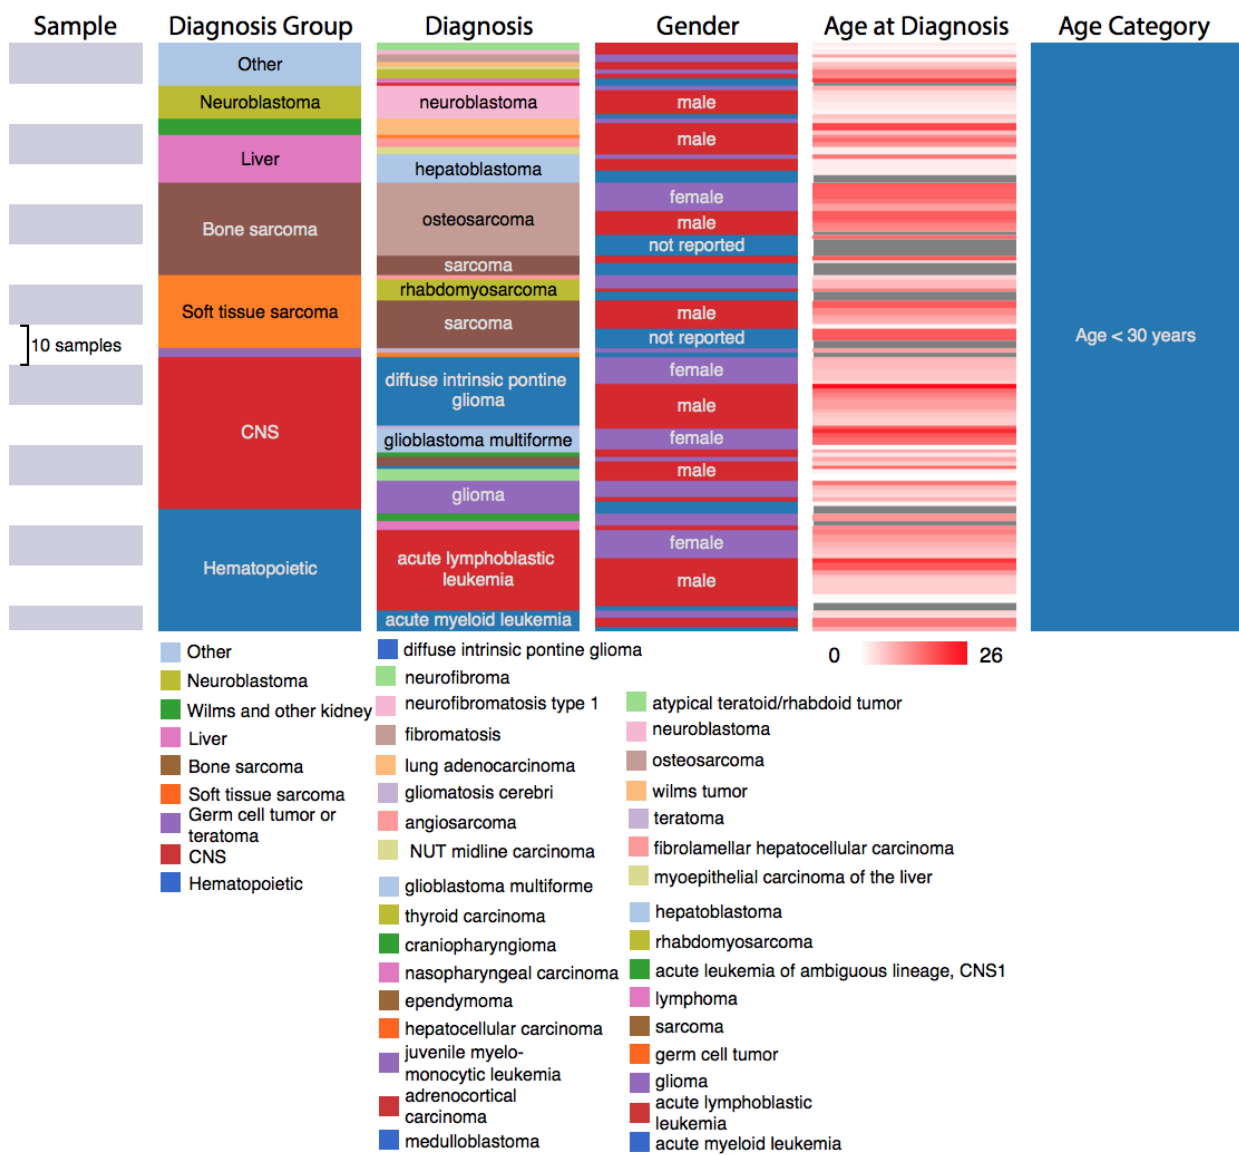



**eTable 3. Findings from comparative RNA-Seq analysis and comparisons to mutation analysis.**

Panel A, "DNA-RNA comparison", details comparisons of DNA and RNA findings for 74 samples with both types of data. Panel B contains results from comparative RNA-Seq analysis for all 144 samples.

**A. DNA-RNA comparison for 74 samples with both types of data.**

| TH sample ID  | Diagnosis                    | At least one DNA target aberrantly expressed? | Utility of RNA sequencing                     | Solid / leukemia | DNA mutation call of clinical relevance | DNA mutation category NCI Pediatric MATCH | Treehouse category             | Outlier confirmed by pathway | Outlier not confirmed by pathway | gene         | mutation               | note   | testVendor |
|---------------|------------------------------|-----------------------------------------------|-----------------------------------------------|------------------|-----------------------------------------|-------------------------------------------|--------------------------------|------------------------------|----------------------------------|--------------|------------------------|--------|------------|
| TH01_0123_S01 | acute lymphoblastic leukemia | Yes                                           | Prioritizing among multiple DNA findings      | leukemia         |                                         |                                           |                                |                              |                                  | new sample   |                        |        |            |
|               |                              |                                               |                                               |                  | FLT3 amplification                      | Receptor Tyrosine Kinase (RTK)            | Receptor Tyrosine Kinase (RTK) | FLT3, FLT4                   |                                  | FLT3         | Low-levelAmplification |        | NantOmics  |
|               |                              |                                               |                                               |                  | JAK2 p.R683S                            | JAK/STAT                                  | JAK/STAT                       | JAK3                         |                                  | JAK2         | p.R683S                |        | NantOmics  |
|               |                              |                                               |                                               |                  |                                         |                                           | B-cell receptor signaling      | MS4A1                        |                                  | JAK2         | p.R683S                |        | NantOmics  |
|               |                              |                                               |                                               |                  |                                         |                                           | PI3K/AKT/mTOR                  | PIK3CD, PIK3CG, RPTOR        |                                  |              |                        |        |            |
| TH01_0132_S01 | acute myeloid leukemia       | RNA only target                               | RNA only target                               | leukemia         |                                         |                                           |                                |                              |                                  | new sample   |                        |        |            |
|               |                              |                                               |                                               |                  | No druggable mutations                  |                                           | B-cell receptor signaling      | BTK                          |                                  | MLLT10-KMT2A | MLL rearrangement      |        | NantOmics  |
|               |                              |                                               |                                               |                  |                                         |                                           | Cell cycle                     | CDK6                         |                                  |              |                        |        |            |
|               |                              |                                               |                                               |                  |                                         |                                           | PI3K/AKT/mTOR                  | PIK3CG                       |                                  |              |                        |        |            |
| TH01_0129_S01 | acute lymphoblastic leukemia | No                                            | Additional expression support for DNA finding | leukemia         |                                         |                                           |                                |                              |                                  | new sample   |                        |        |            |
|               |                              |                                               |                                               |                  | BCR-ABL1 fusion                         | Other                                     |                                |                              |                                  |              |                        |        |            |
|               |                              |                                               |                                               |                  |                                         |                                           | B-cell receptor signaling      | MS4A1                        |                                  | BCR-ABL1     |                        |        | NantOmics  |
|               |                              |                                               |                                               |                  |                                         |                                           | PI3K/AKT/mTOR                  | PIK3CG                       |                                  |              |                        |        |            |
| TH01_0120_S01 | acute myeloid leukemia       | RNA only target                               | RNA only target                               | leukemia         |                                         |                                           |                                |                              |                                  | new sample   |                        |        |            |
|               |                              |                                               |                                               |                  | No druggable mutations                  |                                           | Cell cycle                     | CDK6                         |                                  | GATA2        | p.L321F                |        | NantOmics  |
|               |                              |                                               |                                               |                  |                                         |                                           | Receptor Tyrosine Kinase (RTK) | KIT                          |                                  |              |                        |        |            |
| TH01_0121_S01 | acute lymphoblastic leukemia | RNA only target                               | RNA only target                               | leukemia         |                                         |                                           |                                |                              |                                  | new sample   |                        |        |            |
|               |                              |                                               |                                               |                  | No druggable mutations                  |                                           | JAK/STAT                       | IL6R, JAK3, STAT5B           |                                  |              |                        |        | NantOmics  |
|               |                              |                                               |                                               |                  |                                         |                                           | B-cell receptor signaling      | MS4A1                        |                                  |              |                        |        |            |
|               |                              |                                               |                                               |                  |                                         |                                           | PI3K/AKT/mTOR                  | PIK3CD, PIK3CG, PIK3R5       |                                  |              |                        |        |            |
| TH01_0122_S01 | acute lymphoblastic leukemia | No                                            | Additional expression support for DNA finding | leukemia         |                                         |                                           |                                |                              |                                  | new sample   |                        |        |            |
|               |                              |                                               |                                               |                  | PAX5-JAK2 fusion                        | JAK/STAT                                  |                                |                              |                                  | PAX5-JAK2    |                        |        | NantOmics  |
|               |                              |                                               |                                               |                  |                                         |                                           | B-cell receptor signaling      | MS4A1                        |                                  |              |                        |        |            |
|               |                              |                                               |                                               |                  |                                         |                                           | PI3K/AKT/mTOR                  | PIK3CD, PIK3CG               |                                  |              |                        |        |            |
| TH01_0124_S01 | acute lymphoblastic leukemia | No                                            |                                               | leukemia         |                                         |                                           |                                |                              |                                  | new sample   |                        |        |            |
|               |                              |                                               |                                               |                  | KRAS p.G13D, NRAS p.G12D                | RAS/RAF/MEK                               |                                |                              |                                  | KRAS         | p.G13D                 |        | NantOmics  |
|               |                              |                                               |                                               |                  |                                         |                                           | Receptor Tyrosine Kinase (RTK) | FLT3                         |                                  | NRAS         | p.G12D                 |        | NantOmics  |
| TH01_0125_S01 | acute lymphoblastic leukemia | RNA only target                               | RNA only target                               | leukemia         |                                         |                                           |                                |                              |                                  | new sample   |                        |        |            |
|               |                              |                                               |                                               |                  | No druggable mutations                  |                                           | Receptor Tyrosine Kinase (RTK) | FLT3                         |                                  | CSF3R        | p.D320N                |        | NantOmics  |
|               |                              |                                               |                                               |                  |                                         |                                           |                                |                              |                                  | KMT2A-AFF1   |                        |        | NantOmics  |
|               |                              |                                               |                                               |                  |                                         |                                           | PI3K/AKT/mTOR                  | PIK3CG                       |                                  | TSC2         | p. R367Q               | Benign | NantOmics  |
|               |                              |                                               |                                               |                  |                                         |                                           | Cell cycle                     | CDK6                         |                                  |              |                        |        |            |
|               |                              |                                               |                                               |                  |                                         |                                           | B-cell receptor signaling      | BTK                          |                                  |              |                        |        |            |
| TH01_0126_S01 | acute lymphoblastic leukemia | DNA only target                               | DNA only target                               | leukemia         |                                         |                                           |                                |                              |                                  | new sample   |                        |        |            |
|               |                              |                                               |                                               |                  | NRAS p.G12D                             | RAS/RAF/MEK                               | No automated leads             |                              |                                  | NRAS         | p.G12D                 |        | NantOmics  |
|               |                              |                                               |                                               |                  | CDKN2A deletion                         | Cell Cycle                                |                                |                              |                                  | CDKN2A       | deletion               |        | NantOmics  |
| TH01_0128_S01 | acute lymphoblastic leukemia | RNA only target                               | RNA only target                               | leukemia         |                                         |                                           |                                |                              |                                  | new sample   |                        |        |            |
|               |                              |                                               |                                               |                  | No druggable mutations                  |                                           | JAK/STAT                       | IL6R                         |                                  |              |                        |        | NantOmics  |
|               |                              |                                               |                                               |                  |                                         |                                           | PI3K/AKT/mTOR                  | PIK3CD, PIK3CG, PIK3R5       |                                  |              |                        |        |            |
| TH01_0134_S01 | acute lymphoblastic leukemia | No                                            | Additional expression support for DNA finding | leukemia         |                                         |                                           |                                |                              |                                  | new sample   |                        |        |            |
|               |                              |                                               |                                               |                  | NRAS p.G13D                             | RAS/RAF/MEK                               |                                |                              |                                  | NRAS         | p. G13D                |        | NantOmics  |
|               |                              |                                               |                                               |                  |                                         |                                           | Cell cycle                     | CDK6                         |                                  |              |                        |        |            |
| TH01_0133_S01 | acute lymphoblastic leukemia | RNA only target                               | RNA only target                               | leukemia         |                                         |                                           |                                |                              |                                  | new sample   |                        |        |            |
|               |                              |                                               |                                               |                  | No druggable mutations                  |                                           | Receptor Tyrosine Kinase (RTK) |                              | FLT3                             |              |                        |        | NantOmics  |
| TH01_0131_S01 | acute lymphoblastic leukemia | No                                            | DNA finding likely a technical artifact       | leukemia         |                                         |                                           |                                |                              |                                  | new sample   |                        |        |            |

|               |                                  |                       |                                               |          |                                                                         |                                |                                |                    |       |            |          |  |                  |
|---------------|----------------------------------|-----------------------|-----------------------------------------------|----------|-------------------------------------------------------------------------|--------------------------------|--------------------------------|--------------------|-------|------------|----------|--|------------------|
|               |                                  |                       |                                               |          | JAK2 p.R683S                                                            | JAK/STAT                       |                                |                    |       | JAK2       | p.R683S  |  | NantOmics        |
|               |                                  |                       |                                               |          |                                                                         |                                | B-cell receptor signaling      | BTK                |       |            |          |  |                  |
|               |                                  |                       |                                               |          |                                                                         |                                | Cell cycle                     | CDK6               |       |            |          |  |                  |
|               |                                  |                       |                                               |          |                                                                         |                                | Receptor Tyrosine Kinase (RTK) | FLT3, FLT4         |       |            |          |  |                  |
|               |                                  |                       |                                               |          |                                                                         |                                | PI3K/AKT/mTOR                  | PIK3CG             |       |            |          |  |                  |
| TH01_0127_S01 | acute lymphoblastic leukemia     | Yes                   | Prioritizing among multiple DNA findings      | leukemia |                                                                         |                                |                                |                    |       | new sample |          |  |                  |
|               |                                  |                       |                                               |          | FLT3 p.V592D                                                            | Receptor Tyrosine Kinase (RTK) | Receptor Tyrosine Kinase (RTK) | FLT3               |       | FLT3       | p.V592D  |  | NantOmics        |
|               |                                  |                       |                                               |          | KRAS p.G12D                                                             | RAS/RAF/MEK                    |                                |                    |       | KRAS       | p.G12D   |  | NantOmics        |
|               |                                  |                       |                                               |          |                                                                         |                                | B-cell receptor signaling      | BTK                |       |            |          |  |                  |
|               |                                  |                       |                                               |          |                                                                         |                                | PI3K/AKT/mTOR                  | PIK3CG             |       |            |          |  |                  |
| TH01_0130_S01 | acute lymphoblastic leukemia     | No                    | Additional expression support for DNA finding | leukemia |                                                                         |                                |                                |                    |       | new sample |          |  |                  |
|               |                                  |                       |                                               |          | PAX5-JAK2 fusion                                                        | JAK/STAT                       |                                |                    |       | PAX5-JAK2  |          |  | NantOmics        |
|               |                                  |                       |                                               |          |                                                                         |                                | Receptor Tyrosine Kinase (RTK) | FLT3               |       |            |          |  |                  |
|               |                                  |                       |                                               |          |                                                                         |                                | B-cell receptor signaling      | MS4A1              |       |            |          |  |                  |
|               |                                  |                       |                                               |          |                                                                         |                                | PI3K/AKT/mTOR                  | PIK3CG             |       |            |          |  |                  |
| TH02_0082_S01 | diffuse intrinsic pontine glioma | No DNA or RNA targets | No DNA or RNA targets                         | solid    |                                                                         |                                |                                |                    |       | new sample |          |  |                  |
|               |                                  |                       |                                               |          | No druggable mutations                                                  |                                |                                |                    |       | H3F3A      | p.K27M   |  | Ashion Analytics |
| TH02_0083_S01 | diffuse intrinsic pontine glioma | Yes                   | Prioritizing among multiple DNA findings      | solid    |                                                                         |                                |                                |                    |       | new sample |          |  |                  |
|               |                                  |                       |                                               |          |                                                                         |                                |                                |                    |       | CRKL       | Gain     |  | Ashion Analytics |
|               |                                  |                       |                                               |          |                                                                         |                                |                                |                    |       | H3F3A      | p.K27M   |  | Ashion Analytics |
|               |                                  |                       |                                               |          | KDR gain                                                                | Receptor Tyrosine Kinase (RTK) |                                |                    |       | KDR        | Gain     |  | Ashion Analytics |
|               |                                  |                       |                                               |          | KIT gain                                                                | Receptor Tyrosine Kinase (RTK) |                                |                    |       | KIT        | Gain     |  | Ashion Analytics |
|               |                                  |                       |                                               |          |                                                                         |                                |                                |                    |       | MAPK1      | Gain     |  | Ashion Analytics |
|               |                                  |                       |                                               |          | MET gain                                                                | Receptor Tyrosine Kinase (RTK) |                                |                    |       | MET        | Gain     |  | Ashion Analytics |
|               |                                  |                       |                                               |          | PDGFRA gain                                                             | Receptor Tyrosine Kinase (RTK) | Receptor Tyrosine Kinase (RTK) | PDGFRA             |       | PDGFRA     | Gain     |  | Ashion Analytics |
|               |                                  |                       |                                               |          |                                                                         |                                |                                |                    |       | TP53       | p.G245S  |  | Ashion Analytics |
| TH02_0084_S01 | diffuse intrinsic pontine glioma | No DNA or RNA targets | No DNA or RNA targets                         | solid    |                                                                         |                                |                                |                    |       | new sample |          |  |                  |
|               |                                  |                       |                                               |          | No druggable mutations                                                  |                                |                                |                    |       | TP53       | p.A159P  |  | Ashion Analytics |
| TH02_0085_S01 | diffuse intrinsic pontine glioma | Yes                   | Prioritizing among multiple DNA findings      | solid    |                                                                         |                                |                                |                    |       | new sample |          |  |                  |
|               |                                  |                       |                                               |          |                                                                         |                                |                                |                    |       | H3F3A      | p.K27M   |  | Ashion Analytics |
|               |                                  |                       |                                               |          | KDR gain                                                                | Receptor Tyrosine Kinase (RTK) |                                |                    |       | KDR        | Gain     |  | Ashion Analytics |
|               |                                  |                       |                                               |          | KIT gain                                                                | Receptor Tyrosine Kinase (RTK) |                                |                    |       | KIT        | Gain     |  | Ashion Analytics |
|               |                                  |                       |                                               |          | PDGFRA gain                                                             | Receptor Tyrosine Kinase (RTK) | Receptor Tyrosine Kinase (RTK) | PDGFRA             |       | PDGFRA     | Gain     |  | Ashion Analytics |
|               |                                  |                       |                                               |          |                                                                         |                                |                                |                    |       | TP53       | p.A159P  |  | Ashion Analytics |
| TH02_0086_S01 | diffuse intrinsic pontine glioma | RNA only target       | RNA only target                               | solid    |                                                                         |                                |                                |                    |       | new sample |          |  |                  |
|               |                                  |                       |                                               |          | No druggable mutations                                                  |                                | Sonic Hedgehog (SHH)           |                    | PTCH1 | ATRX       | p.W2001X |  | Ashion Analytics |
|               |                                  |                       |                                               |          |                                                                         |                                |                                |                    |       | H3F3A      | p.K27M   |  | Ashion Analytics |
|               |                                  |                       |                                               |          |                                                                         |                                |                                |                    |       | PPM1D      | p.S421X  |  | Ashion Analytics |
| TH02_0087_S01 | diffuse intrinsic pontine glioma | No                    |                                               | solid    |                                                                         |                                |                                |                    |       | new sample |          |  |                  |
|               |                                  |                       |                                               |          |                                                                         |                                |                                |                    |       | H3F3A      | p.K27M   |  | Ashion Analytics |
|               |                                  |                       |                                               |          | PIK3R1 unspecified aberration, called druggable by clinical testing lab | PI3K/AKT/mTOR                  |                                |                    |       | PIK3R1     | p.K567E  |  | Ashion Analytics |
|               |                                  |                       |                                               |          |                                                                         |                                |                                |                    |       | PPM1D      | p.I546fs |  | Ashion Analytics |
|               |                                  |                       |                                               |          |                                                                         |                                |                                |                    |       | TP53       | p.R282W  |  | Ashion Analytics |
| TH02_0087_S02 | diffuse intrinsic pontine glioma | DNA only target       | DNA only target                               | solid    |                                                                         |                                |                                |                    |       | new sample |          |  |                  |
|               |                                  |                       |                                               |          |                                                                         |                                |                                |                    |       | H3F3A      | p.K27M   |  | Ashion Analytics |
|               |                                  |                       |                                               |          | PIK3R1 unspecified aberration, called druggable by clinical testing lab | PI3K/AKT/mTOR                  |                                | No automated leads |       | PIK3R1     | p.K567E  |  | Ashion Analytics |
|               |                                  |                       |                                               |          |                                                                         |                                |                                |                    |       | PPM1D      | p.I546fs |  | Ashion Analytics |
| TH02_0088_S01 | diffuse intrinsic pontine glioma | No DNA or RNA targets | No DNA or RNA targets                         | solid    |                                                                         |                                |                                |                    |       | new sample |          |  |                  |
|               |                                  |                       |                                               |          | No druggable mutations                                                  |                                |                                |                    |       | ATRX       | Deletion |  | Ashion Analytics |
|               |                                  |                       |                                               |          |                                                                         |                                |                                |                    |       | H3F3A      | p.K27M   |  | Ashion Analytics |
|               |                                  |                       |                                               |          |                                                                         |                                |                                |                    |       | TP53       | p.S37Y   |  | Ashion Analytics |
|               |                                  |                       |                                               |          |                                                                         |                                |                                |                    |       | TP53       | p.V157L  |  | Ashion Analytics |
| TH02_0089_S01 | diffuse intrinsic pontine glioma | No DNA or RNA targets | No DNA or RNA targets                         | solid    |                                                                         |                                |                                |                    |       | new sample |          |  |                  |
|               |                                  |                       |                                               |          | No druggable mutations                                                  |                                |                                |                    |       | ATRX       | p.A1812P |  | Ashion Analytics |
|               |                                  |                       |                                               |          |                                                                         |                                |                                |                    |       | H3F3A      | p.K27M   |  | Ashion Analytics |
|               |                                  |                       |                                               |          |                                                                         |                                |                                |                    |       | TP53       | p.R248W  |  | Ashion Analytics |
| TH02_0090_S01 | diffuse intrinsic pontine glioma | Yes                   | Additional expression support for DNA finding | solid    |                                                                         |                                |                                |                    |       | new sample |          |  |                  |
|               |                                  |                       |                                               |          |                                                                         |                                | Sonic Hedgehog (SHH)           |                    | PTCH1 |            |          |  |                  |



|               |                                  |                       |                                               |       |                        |                                |                                |         |       |            |                          |  |                     |
|---------------|----------------------------------|-----------------------|-----------------------------------------------|-------|------------------------|--------------------------------|--------------------------------|---------|-------|------------|--------------------------|--|---------------------|
|               |                                  |                       |                                               |       | IGF1R gain             | Receptor Tyrosine Kinase (RTK) |                                |         |       | ATRX       | p.E2279X                 |  | Ashion Analytics    |
|               |                                  |                       |                                               |       |                        |                                |                                |         |       | IGF1R      | Gain                     |  | Ashion Analytics    |
|               |                                  |                       |                                               |       |                        |                                |                                |         |       | TP53       | p.R110L                  |  | Ashion Analytics    |
| TH02_0091_S01 | diffuse intrinsic pontine glioma | No                    |                                               | solid |                        |                                |                                |         |       | new sample |                          |  |                     |
|               |                                  |                       |                                               |       |                        |                                | Receptor Tyrosine Kinase (RTK) | CSF1R   |       |            |                          |  |                     |
|               |                                  |                       |                                               |       | BRAF p.V600E           | RAS/RAF/MEK                    |                                |         |       | BRAF       | p.V600E                  |  | Ashion Analytics    |
|               |                                  |                       |                                               |       |                        |                                |                                |         |       | H3F3A      | p.K27M                   |  | Ashion Analytics    |
| TH02_0092_S01 | diffuse intrinsic pontine glioma | No                    | Additional expression support for DNA finding | solid |                        |                                |                                |         |       | new sample |                          |  |                     |
|               |                                  |                       |                                               |       |                        |                                | RAS/RAF/MEK                    | MEK1    |       | ATRX       | p.K1357fs                |  | Ashion Analytics    |
|               |                                  |                       |                                               |       |                        |                                |                                |         |       | H3F3A      | p.K27M                   |  | Ashion Analytics    |
|               |                                  |                       |                                               |       | KDR gain               | Receptor Tyrosine Kinase (RTK) |                                |         |       | KDR        | Gain                     |  | Ashion Analytics    |
|               |                                  |                       |                                               |       | KIT gain               | Receptor Tyrosine Kinase (RTK) |                                |         |       | KIT        | Gain                     |  | Ashion Analytics    |
|               |                                  |                       |                                               |       | PDGFRA gain            | Receptor Tyrosine Kinase (RTK) |                                |         |       | PDGFRA     | Gain                     |  | Ashion Analytics    |
|               |                                  |                       |                                               |       |                        |                                |                                |         |       | PTEN       | Deletion                 |  | Ashion Analytics    |
|               |                                  |                       |                                               |       |                        |                                |                                |         |       | TP53       | p.R196P                  |  | Ashion Analytics    |
| TH02_0093_S01 | diffuse intrinsic pontine glioma | DNA only target       | DNA only target                               | solid |                        |                                |                                |         |       | new sample |                          |  |                     |
|               |                                  |                       |                                               |       |                        |                                | No automated leads             |         |       | H3F3A      | p.K27M                   |  | Ashion Analytics    |
|               |                                  |                       |                                               |       | MET gain               | Receptor Tyrosine Kinase (RTK) |                                |         |       | MET        | Gain                     |  | Ashion Analytics    |
|               |                                  |                       |                                               |       | PDGFRA gain            | Receptor Tyrosine Kinase (RTK) |                                |         |       | PDGFRA     | Gain                     |  | Ashion Analytics    |
|               |                                  |                       |                                               |       |                        |                                |                                |         |       | TP53       | p.C242Y                  |  | Ashion Analytics    |
|               |                                  |                       |                                               |       |                        |                                |                                |         |       | TP53       | p.K120E                  |  |                     |
| TH02_0094_S01 | diffuse intrinsic pontine glioma | Yes                   | Additional expression support for DNA finding | solid |                        |                                |                                |         |       | new sample |                          |  |                     |
|               |                                  |                       |                                               |       |                        |                                |                                |         |       | H3F3A      | p.K27M                   |  | Ashion Analytics    |
|               |                                  |                       |                                               |       | MET gain               | Receptor Tyrosine Kinase (RTK) | Receptor Tyrosine Kinase (RTK) |         | MET   | MET        | Gain                     |  | Ashion Analytics    |
|               |                                  |                       |                                               |       |                        |                                |                                |         |       | TP53       | p.R273C                  |  | Ashion Analytics    |
| TH02_0095_S01 | diffuse intrinsic pontine glioma | RNA only target       | RNA only target                               | solid |                        |                                |                                |         |       | new sample |                          |  |                     |
|               |                                  |                       |                                               |       | No druggable mutations |                                | Sonic Hedgehog (SHH)           |         | PTCH1 | ACVR1      | p.R206H                  |  | Ashion Analytics    |
|               |                                  |                       |                                               |       |                        |                                |                                |         |       | HIST1H3B   | p.K27M                   |  | Ashion Analytics    |
|               |                                  |                       |                                               |       |                        |                                |                                |         |       | TP53       | p.R248Q                  |  | Ashion Analytics    |
| TH02_0096_S01 | diffuse intrinsic pontine glioma | No DNA or RNA targets | No DNA or RNA targets                         | solid |                        |                                |                                |         |       | new sample |                          |  |                     |
|               |                                  |                       |                                               |       | No druggable mutations |                                | No automated leads             |         |       | DDX11      | p.R167T                  |  | Ashion Analytics    |
|               |                                  |                       |                                               |       |                        |                                |                                |         |       | PPM1D      | p.E405X                  |  | Ashion Analytics    |
|               |                                  |                       |                                               |       |                        |                                |                                |         |       | H3F3A      | p.K27M                   |  | Ashion Analytics    |
| TH03_0003_S01 | sarcoma                          | DNA only target       | DNA only target                               | solid |                        |                                |                                |         |       | new sample |                          |  |                     |
|               |                                  |                       |                                               |       |                        |                                | No automated leads             |         |       | ATRX       | LossExons13-35           |  | Foundation Medicine |
|               |                                  |                       |                                               |       | CDKN2A/2B deletion     | Cell Cycle                     |                                |         |       | CDKN2A     | CDKN2A_loss              |  | Foundation Medicine |
|               |                                  |                       |                                               |       |                        |                                |                                |         |       | CDKN2B     | CDKN2B_loss              |  | Foundation Medicine |
|               |                                  |                       |                                               |       |                        |                                |                                |         |       | TP53       | TruncationExon9          |  | Foundation Medicine |
| TH03_0003_S03 | sarcoma                          | DNA only target       | DNA only target                               | solid |                        |                                |                                |         |       | new sample |                          |  |                     |
|               |                                  |                       |                                               |       |                        |                                | No automated leads             |         |       | ATRX       | LossExons13-35           |  | Foundation Medicine |
|               |                                  |                       |                                               |       | CDKN2A/2B deletion     | Cell Cycle                     |                                |         |       | CDKN2A     | CDKN2A_loss              |  | Foundation Medicine |
|               |                                  |                       |                                               |       |                        |                                |                                |         |       | CDKN2B     | CDKN2B_loss              |  | Foundation Medicine |
|               |                                  |                       |                                               |       |                        |                                |                                |         |       | TP53       | TruncationExon9          |  | Foundation Medicine |
| TH03_0003_S04 | sarcoma                          | DNA only target       | DNA only target                               | solid |                        |                                |                                |         |       | new sample |                          |  |                     |
|               |                                  |                       |                                               |       |                        |                                | No automated leads             |         |       | ATRX       | LossExons13-35           |  | Foundation Medicine |
|               |                                  |                       |                                               |       | CDKN2A/2B deletion     | Cell Cycle                     |                                |         |       | CDKN2A     | CDKN2A_loss              |  | Foundation Medicine |
|               |                                  |                       |                                               |       |                        |                                |                                |         |       | CDKN2B     | CDKN2B_loss              |  | Foundation Medicine |
|               |                                  |                       |                                               |       |                        |                                |                                |         |       | TP53       | TruncationExon9          |  | Foundation Medicine |
| TH03_0004_S02 | hepatoblastoma                   | No DNA or RNA targets | No DNA or RNA targets                         | solid |                        |                                |                                |         |       | new sample |                          |  |                     |
|               |                                  |                       |                                               |       | No druggable mutations |                                | No automated leads             |         |       | CTNNB1     | p.G34V                   |  | Foundation Medicine |
|               |                                  |                       |                                               |       |                        |                                |                                |         |       | CTNNB1     | p.G34V                   |  | Foundation Medicine |
| TH03_0004_S03 | hepatoblastoma                   | No DNA or RNA targets | No DNA or RNA targets                         | solid |                        |                                |                                |         |       | new sample |                          |  |                     |
|               |                                  |                       |                                               |       | No druggable mutations |                                | No automated leads             |         |       | CTNNB1     | p.G34V                   |  | Foundation Medicine |
|               |                                  |                       |                                               |       |                        |                                |                                |         |       | CTNNB1     | p.G34V                   |  | Foundation Medicine |
| TH03_0004_S04 | hepatoblastoma                   | RNA only target       | RNA only target                               | solid |                        |                                |                                |         |       | new sample |                          |  |                     |
|               |                                  |                       |                                               |       | No druggable mutations |                                | JAK/STAT                       | IL6     |       | CTNNB1     | p.G34V                   |  | Foundation Medicine |
|               |                                  |                       |                                               |       |                        |                                | Heat Shock Proteins            | HSP90B1 |       | CTNNB1     | p.G34V                   |  | Foundation Medicine |
| TH03_0005_S01 | nasopharyngeal carcinoma         | No DNA or RNA targets | No DNA or RNA targets                         | solid |                        |                                |                                |         |       | new sample |                          |  |                     |
|               |                                  |                       |                                               |       | No druggable mutations |                                | No automated leads             |         |       | CTNNB1     | DuplicationExons9-13     |  | Foundation Medicine |
|               |                                  |                       |                                               |       |                        |                                |                                |         |       | CTNNB1     | DuplicationExons9-13     |  | Foundation Medicine |
|               |                                  |                       |                                               |       |                        |                                |                                |         |       | TP53       | p.S241F                  |  | Foundation Medicine |
|               |                                  |                       |                                               |       |                        |                                |                                |         |       | TP53       | p.S241F                  |  | Foundation Medicine |
| TH03_0006_S01 | rhabdomyosarcoma                 | RNA only target       | RNA only target                               | solid |                        |                                |                                |         |       | new sample |                          |  |                     |
|               |                                  |                       |                                               |       | No druggable mutations |                                | Heat Shock Proteins            | HSP90B1 |       | BRD4       | RearrangementExon6       |  | Foundation Medicine |
|               |                                  |                       |                                               |       |                        |                                |                                |         |       | CREBBP     | s894fs*64                |  | Foundation Medicine |
|               |                                  |                       |                                               |       |                        |                                |                                |         |       | IKZF2      | DeletionExon 4           |  | Foundation Medicine |
|               |                                  |                       |                                               |       |                        |                                |                                |         |       | MYC        | Amplification(Equivocal) |  | Foundation Medicine |
|               |                                  |                       |                                               |       |                        |                                |                                |         |       | TP53       | p.R282W                  |  | Foundation Medicine |
| TH03_0006_S03 | rhabdomyosarcoma                 | No DNA or RNA targets | No DNA or RNA targets                         | solid |                        |                                |                                |         |       | new sample |                          |  |                     |
|               |                                  |                       |                                               |       | No druggable mutations |                                | No automated leads             |         |       | BRD4       | RearrangementExon6       |  | Foundation Medicine |

|               |                                           |                       |                                               |          |                        |                     |                      |                                |        |            |                          |  |                     |
|---------------|-------------------------------------------|-----------------------|-----------------------------------------------|----------|------------------------|---------------------|----------------------|--------------------------------|--------|------------|--------------------------|--|---------------------|
|               |                                           |                       |                                               |          |                        |                     |                      |                                |        | CREBBP     | s894fs*64                |  | Foundation Medicine |
|               |                                           |                       |                                               |          |                        |                     |                      |                                |        | IKZF2      | DeletionExon 4           |  | Foundation Medicine |
|               |                                           |                       |                                               |          |                        |                     |                      |                                |        | MYC        | Amplification(Equivocal) |  | Foundation Medicine |
|               |                                           |                       |                                               |          |                        |                     |                      |                                |        | TP53       | p.R282W                  |  | Foundation Medicine |
| TH03_0008_S01 | neuroblastoma                             | RNA only target       | RNA only target                               | solid    |                        |                     |                      |                                |        | new sample |                          |  |                     |
|               |                                           |                       |                                               |          | No druggable mutations |                     |                      | PI3K/AKT/mTOR                  | RPTOR  | ATRX       | LossExons2-9             |  | Foundation Medicine |
|               |                                           |                       |                                               |          |                        |                     |                      | JAK/STAT                       | STAT5  | CIC        | p.R215W                  |  | Foundation Medicine |
|               |                                           |                       |                                               |          |                        |                     |                      |                                |        | MYC        | SingleCopy               |  | Foundation Medicine |
| TH03_0010_S01 | acute leukemia of ambiguous lineage, CNS1 | No                    | Additional expression support for DNA finding | leukemia |                        |                     |                      |                                |        | new sample |                          |  |                     |
|               |                                           |                       |                                               |          |                        |                     |                      | B-cell receptor signaling      | BTK    | CREBBP     | SpliceSite5173-1G>A      |  | Foundation Medicine |
|               |                                           |                       |                                               |          |                        |                     |                      | Cell cycle                     | CDK6   |            |                          |  |                     |
|               |                                           |                       |                                               |          |                        |                     |                      | JAK/STAT                       | STAT5A | JAK3       | p.A573T                  |  | Foundation Medicine |
|               |                                           |                       |                                               |          | NRAS p.Q61H            | RAS/RAF/MEK         |                      |                                |        | NRAS       | p.Q61H                   |  | Foundation Medicine |
|               |                                           |                       |                                               |          |                        |                     |                      |                                |        | TP53       | p.C135F                  |  | Foundation Medicine |
| TH03_0010_S02 | acute leukemia of ambiguous lineage, CNS1 | No                    | Additional expression support for DNA finding | leukemia |                        |                     |                      |                                |        | new sample |                          |  |                     |
|               |                                           |                       |                                               |          |                        |                     |                      | B-cell receptor signaling      | BTK    | CREBBP     | SpliceSite5173-1G>A      |  | Foundation Medicine |
|               |                                           |                       |                                               |          |                        |                     |                      | BCL2/MDM2                      | MDM2   | JAK3       | p.A573T                  |  | Foundation Medicine |
|               |                                           |                       |                                               |          |                        |                     |                      | JAK/STAT                       | STAT5A |            |                          |  |                     |
|               |                                           |                       |                                               |          | NRAS p.Q61H            | RAS/RAF/MEK         |                      |                                |        | NRAS       | p.Q61H                   |  | Foundation Medicine |
|               |                                           |                       |                                               |          |                        |                     |                      |                                |        | TP53       | p.C135F                  |  | Foundation Medicine |
| TH03_0011_S01 | acute lymphoblastic leukemia              | No                    | Additional expression support for DNA finding | leukemia |                        |                     |                      |                                |        | new sample |                          |  |                     |
|               |                                           |                       |                                               |          |                        |                     |                      | B-cell receptor signaling      | BTK    | BCOR       | p.C1572F                 |  | Foundation Medicine |
|               |                                           |                       |                                               |          |                        |                     |                      | Cell cycle                     | CCND3  | BCOR       | p.C1572F                 |  | Foundation Medicine |
|               |                                           |                       |                                               |          |                        |                     |                      | Receptor Tyrosine Kinase (RTK) | FLT3   | CPS1       | p.K1281                  |  | Foundation Medicine |
|               |                                           |                       |                                               |          |                        |                     |                      | JAK/STAT                       | IL6R   | EXOSC6     | p.G10C                   |  | Foundation Medicine |
|               |                                           |                       |                                               |          |                        |                     |                      |                                |        | EXOSC6     | p.G10C                   |  | Foundation Medicine |
|               |                                           |                       |                                               |          |                        |                     |                      |                                |        | MAP3K1     | p.S939C                  |  | Foundation Medicine |
|               |                                           |                       |                                               |          |                        |                     |                      |                                |        | MAP3K1     | p.S939C                  |  | Foundation Medicine |
|               |                                           |                       |                                               |          |                        |                     |                      |                                |        | MLL2       | p.V4305I                 |  | Foundation Medicine |
|               |                                           |                       |                                               |          |                        |                     |                      |                                |        | MLL2       | p.V4305I                 |  | Foundation Medicine |
|               |                                           |                       |                                               |          |                        |                     |                      |                                |        | MLL3       | p.G1582V                 |  | Foundation Medicine |
|               |                                           |                       |                                               |          |                        |                     |                      |                                |        | MLL3       | p.G1582V                 |  | Foundation Medicine |
|               |                                           |                       |                                               |          |                        |                     |                      |                                |        | MLL3       | p.L804V                  |  | Foundation Medicine |
|               |                                           |                       |                                               |          |                        |                     |                      |                                |        | NCOR2      | p.K1405R                 |  | Foundation Medicine |
|               |                                           |                       |                                               |          |                        |                     |                      |                                |        | NOTCH1     | p.T859M                  |  | Foundation Medicine |
|               |                                           |                       |                                               |          | NRAS p.Q61K            | RAS/RAF/MEK         |                      |                                |        | NRAS       | p.Q61K                   |  | Foundation Medicine |
|               |                                           |                       |                                               |          |                        |                     |                      |                                |        | NTRK1      | p.R744H                  |  | Foundation Medicine |
|               |                                           |                       |                                               |          |                        |                     |                      |                                |        | PCLO       | p.S4289_S4292del         |  | Foundation Medicine |
| TH03_0012_S01 | wilms tumor                               | RNA only target       | RNA only target                               | solid    |                        |                     |                      |                                |        | new sample |                          |  |                     |
|               |                                           |                       |                                               |          | No druggable mutations |                     |                      | PI3K/AKT/mTOR                  | PIK3R1 | ABL2       | p.T671M                  |  | Foundation Medicine |
|               |                                           |                       |                                               |          |                        |                     |                      |                                |        | ALK        | p.E1435K                 |  | Foundation Medicine |
|               |                                           |                       |                                               |          |                        |                     |                      |                                |        | AR         | p.G457_G468del           |  | Foundation Medicine |
|               |                                           |                       |                                               |          |                        |                     |                      |                                |        | ASXL1      | p.G645fs*58              |  | Foundation Medicine |
|               |                                           |                       |                                               |          |                        |                     |                      |                                |        | SPEN       | p.S2306del               |  | Foundation Medicine |
|               |                                           |                       |                                               |          |                        |                     |                      |                                |        | TP53       | p.C176S                  |  | Foundation Medicine |
| TH03_0012_S02 | wilms tumor                               | RNA only target       | RNA only target                               | solid    |                        |                     |                      |                                |        | new sample |                          |  |                     |
|               |                                           |                       |                                               |          | No druggable mutations |                     |                      | JAK/STAT                       | STAT3  | ABL2       | p.T671M                  |  | Foundation Medicine |
|               |                                           |                       |                                               |          |                        |                     |                      |                                |        | ALK        | p.E1435K                 |  | Foundation Medicine |
|               |                                           |                       |                                               |          |                        |                     |                      |                                |        | AR         | p.G457_G468del           |  | Foundation Medicine |
|               |                                           |                       |                                               |          |                        |                     |                      |                                |        | ASXL1      | p.G645fs*58              |  | Foundation Medicine |
|               |                                           |                       |                                               |          |                        |                     |                      |                                |        | SPEN       | p.S2306del               |  | Foundation Medicine |
|               |                                           |                       |                                               |          |                        |                     |                      |                                |        | TP53       | p.C176S                  |  | Foundation Medicine |
| TH03_0016_S01 | atypical teratoid/rhabdoid tumor          | No                    | Additional expression support for DNA finding | solid    |                        |                     |                      |                                |        | new sample |                          |  |                     |
|               |                                           |                       |                                               |          |                        |                     |                      | Receptor Tyrosine Kinase (RTK) | ERBB2  | SMARCB1    | p.P383fs*4+              |  | Foundation Medicine |
|               |                                           |                       |                                               |          |                        |                     |                      | Receptor Tyrosine Kinase (RTK) | FGFR1  |            |                          |  |                     |
|               |                                           |                       |                                               |          |                        |                     |                      | JAK/STAT                       | IL6    |            |                          |  |                     |
|               |                                           |                       |                                               |          |                        | SMARCB1 p.P383fs*4+ | Chromatin remodeling |                                |        |            |                          |  |                     |
| TH03_0019_S01 | fibrolamellar hepatocellular carcinoma    | RNA only target       | RNA only target                               | solid    |                        |                     |                      |                                |        | new sample |                          |  |                     |
|               |                                           |                       |                                               |          | No druggable mutations |                     |                      |                                |        | FANCG      | p.A607T                  |  | Foundation Medicine |
|               |                                           |                       |                                               |          |                        |                     |                      | Receptor Tyrosine Kinase (RTK) | FLT1   |            |                          |  |                     |
|               |                                           |                       |                                               |          |                        |                     |                      | Receptor Tyrosine Kinase (RTK) | KDR    |            |                          |  |                     |
| TH03_0114_S01 | fibrolamellar hepatocellular carcinoma    | RNA only target       | RNA only target                               | solid    |                        |                     |                      |                                |        | new sample |                          |  |                     |
|               |                                           |                       |                                               |          | No druggable mutations |                     |                      | No automated leads             |        | MLL3       | p.C310S                  |  | Foundation Medicine |
|               |                                           |                       |                                               |          |                        |                     |                      |                                |        | TERT       | promoter 124C>T          |  | Foundation Medicine |
| TH03_0143_S01 | osteosarcoma                              | RNA only target       | RNA only target                               | solid    |                        |                     |                      |                                |        | new sample |                          |  |                     |
|               |                                           |                       |                                               |          | No druggable mutations |                     |                      | JAK/STAT                       | IL6    | FANCL      | p.S351fs*2               |  | Foundation Medicine |
|               |                                           |                       |                                               |          |                        |                     |                      |                                |        | MLL3       | p.Y306*                  |  | Foundation Medicine |
| TH03_0143_S02 | osteosarcoma                              | No DNA or RNA targets | No DNA or RNA targets                         | solid    |                        |                     |                      |                                |        | new sample |                          |  |                     |
|               |                                           |                       |                                               |          | No druggable mutations |                     |                      | No automated leads             |        | FANCL      | p.S351fs*2               |  | Foundation Medicine |
|               |                                           |                       |                                               |          |                        |                     |                      |                                |        | MLL3       | p.Y306*                  |  | Foundation Medicine |

|               |                                      |                       |                                               |          |                         |                                |                                |        |       |                                         |                              |  |                      |
|---------------|--------------------------------------|-----------------------|-----------------------------------------------|----------|-------------------------|--------------------------------|--------------------------------|--------|-------|-----------------------------------------|------------------------------|--|----------------------|
| TH03_0149_S01 | acute myeloid leukemia               | Yes                   | Additional expression support for DNA finding | leukemia |                         |                                |                                |        |       | new sample                              |                              |  |                      |
|               |                                      |                       |                                               |          | FLT3-ITD                | Receptor Tyrosine Kinase (RTK) | Receptor Tyrosine Kinase (RTK) | FLT3   |       | FLT3                                    | FLT3-ITD Y597-E598ins15      |  | Foundation Medicine  |
|               |                                      |                       |                                               |          |                         |                                | B-cell receptor signaling      | BTK    |       | WT1                                     | p.S381fs*67                  |  | Foundation Medicine  |
| TH03_0286_S01 | hepatocellular carcinoma             | RNA only target       | RNA only target                               | solid    |                         |                                |                                |        |       | new sample                              |                              |  |                      |
|               |                                      |                       |                                               |          | No druggable mutations  |                                | Receptor Tyrosine Kinase (RTK) | PDGFRB |       | CTNNB1                                  | SpliceSite14-59_241+79del366 |  | Foundation Medicine  |
| TH03_0288_S01 | neuroblastoma                        | RNA only target       | RNA only target                               | solid    |                         |                                |                                |        |       | new sample                              |                              |  |                      |
|               |                                      |                       |                                               |          | No druggable mutations  |                                | Cell cycle                     | CDK6   |       | ATRX                                    | LossExons2-12                |  | Foundation Medicine  |
| TH03_0290_S01 | glioma                               | No                    | No expression evidence for DNA target         | solid    |                         |                                |                                |        |       | new sample                              |                              |  |                      |
|               |                                      |                       |                                               |          | BRAF p.V600E            | RAS/RAF/MEK                    |                                |        |       | BRAF                                    | p.V600E                      |  | Foundation Medicine  |
|               |                                      |                       |                                               |          |                         |                                | JAK/STAT                       | IL6    |       | CDKN2A                                  | CDKN2A/B Loss                |  | Foundation Medicine  |
| TH03_0013_S02 | acute lymphoblastic leukemia         | RNA only target       | RNA only target                               | leukemia |                         |                                |                                |        |       | new sample                              |                              |  |                      |
|               |                                      |                       |                                               |          | No druggable mutations  |                                | Cell cycle                     | CDK6   |       | t(14;19)                                | translocation                |  | chromosomal analysis |
|               |                                      |                       |                                               |          |                         |                                | PI3K/AKT/mTOR                  | PIK3CD |       |                                         |                              |  |                      |
|               |                                      |                       |                                               |          |                         |                                | PI3K/AKT/mTOR                  | PIK3R5 |       | IGH                                     | possible rearrangement       |  | FISH                 |
| TH03_0013_S01 | acute lymphoblastic leukemia         | RNA only target       | RNA only target                               | leukemia |                         |                                |                                |        |       | new sample                              |                              |  |                      |
|               |                                      |                       |                                               |          | No druggable mutations  |                                | Cell cycle                     | CDK6   |       |                                         |                              |  |                      |
|               |                                      |                       |                                               |          |                         |                                | PI3K/AKT/mTOR                  | PIK3CD |       |                                         |                              |  |                      |
|               |                                      |                       |                                               |          |                         |                                | PI3K/AKT/mTOR                  | PIK3R5 |       |                                         |                              |  |                      |
| TH03_0014_S01 | sarcoma                              | RNA only target       | RNA only target                               | solid    |                         |                                |                                |        |       | new sample                              |                              |  |                      |
|               |                                      |                       |                                               |          | No druggable mutations  |                                | JAK/STAT                       |        | JAK1  | EWSR1                                   | EWSR1-FL1 rearrangement      |  | Foundation Medicine  |
|               |                                      |                       |                                               |          |                         |                                |                                |        |       | FLI1                                    | EWSR1-FL1 rearrangement      |  | Foundation Medicine  |
| TH03_0018_S01 | sarcoma                              | RNA only target       | RNA only target                               | solid    |                         |                                |                                |        |       | new sample                              |                              |  |                      |
|               |                                      |                       |                                               |          | No druggable mutations  |                                | Receptor Tyrosine Kinase (RTK) | FLT4   |       | EWSR1                                   | negative for rearrangement   |  | Foundation Medicine  |
|               |                                      |                       |                                               |          |                         |                                |                                |        |       | SS18                                    | negative for rearrangement   |  | Foundation Medicine  |
|               |                                      |                       |                                               |          |                         |                                |                                |        |       | FM performed, no alterations identified | none                         |  | Foundation Medicine  |
| TH03_0020_S01 | medulloblastoma                      | RNA only target       | RNA only target                               | solid    |                         |                                |                                |        |       | new sample                              |                              |  |                      |
|               |                                      |                       |                                               |          | No druggable mutations  |                                | Sonic Hedgehog (SHH)           | PTCH1  |       | MYC                                     | High amplification           |  | FISH                 |
| TH03_0112_S01 | sarcoma                              | RNA only target       | RNA only target                               | solid    |                         |                                |                                |        |       | new sample                              |                              |  |                      |
|               |                                      |                       |                                               |          | No druggable mutations  |                                | Receptor Tyrosine Kinase (RTK) | ERBB2  |       | SS18                                    | SS18-SSX translocation       |  | Foundation Medicine  |
|               |                                      |                       |                                               |          |                         |                                | PI3K/AKT/mTOR                  | MLST8  |       | SSX                                     | SS18-SSX translocation       |  | Foundation Medicine  |
| TH03_0112_S02 | sarcoma                              | RNA only target       | RNA only target                               | solid    |                         |                                |                                |        |       | new sample                              |                              |  |                      |
|               |                                      |                       |                                               |          | No druggable mutations  |                                | Sonic Hedgehog (SHH)           | GLI1   |       | SS18                                    | SS18-SSX translocation       |  | Foundation Medicine  |
|               |                                      |                       |                                               |          |                         |                                | Sonic Hedgehog (SHH)           | PTCH1  |       | SSX                                     | SS18-SSX translocation       |  | Foundation Medicine  |
| TH03_0113_S01 | myoepithelial carcinoma of the liver | No                    | Additional expression support for DNA finding | solid    |                         |                                |                                |        |       | new sample                              |                              |  |                      |
|               |                                      |                       |                                               |          | INI1 loss of expression | Chromatin remodeling           | Receptor Tyrosine Kinase (RTK) | FGFR1  |       | INI1                                    | Loss of expression           |  | IHC                  |
| TH03_0115_S01 | teratoma                             | No DNA or RNA targets | No DNA or RNA targets                         | solid    |                         |                                |                                |        |       | new sample                              |                              |  |                      |
|               |                                      |                       |                                               |          | No druggable mutations  |                                | No automated leads             |        |       | MLL3                                    | C310S                        |  | Foundation Medicine  |
| TH03_0141_S01 | osteosarcoma                         | Yes                   | Prioritizing among multiple DNA findings      | solid    |                         |                                |                                |        |       | new sample                              |                              |  |                      |
|               |                                      |                       |                                               |          | CCND3 amplification     | Cell Cycle                     | Cell cycle                     | CCND3  |       | CSK4                                    | Amplification                |  | Foundation Medicine  |
|               |                                      |                       |                                               |          |                         |                                | Cell cycle                     | CDK4   |       | MDM2                                    | Amplification                |  | Foundation Medicine  |
|               |                                      |                       |                                               |          | MDM2 amplification      | BCL2/MDM2                      | BCL2/MDM2                      | MDM2   |       | CCND3                                   | Amplification                |  | Foundation Medicine  |
|               |                                      |                       |                                               |          |                         |                                |                                |        |       | FRS2                                    | Amplification                |  | Foundation Medicine  |
| TH03_0144_S01 | wilms tumor                          | RNA only target       | RNA only target                               | solid    |                         |                                |                                |        |       | new sample                              |                              |  |                      |
|               |                                      |                       |                                               |          | No druggable mutations  |                                | PI3K/AKT/mTOR                  | MLST8  |       |                                         |                              |  |                      |
|               |                                      |                       |                                               |          |                         |                                | JAK/STAT                       | STAT1  |       |                                         |                              |  | Foundation Medicine  |
| TH03_0146_S01 | sarcoma                              | RNA only target       | RNA only target                               | solid    |                         |                                |                                |        |       | new sample                              |                              |  |                      |
|               |                                      |                       |                                               |          | No druggable mutations  |                                | Cell cycle                     |        | CCNE1 | CIC                                     | CIC-DUX4 translocation       |  | FISH                 |
|               |                                      |                       |                                               |          |                         |                                | Receptor Tyrosine Kinase (RTK) | FLT4   |       | DUX4                                    | CIC-DUX4 translocation       |  | FISH                 |
| TH03_0296_S01 | osteosarcoma                         | No DNA or RNA targets | No DNA or RNA targets                         | solid    |                         |                                |                                |        |       | new sample                              |                              |  |                      |
|               |                                      |                       |                                               |          | No druggable mutations  |                                | No automated leads             |        |       | MSH3                                    | Splice site 580-2a>g         |  | Foundation Medicine  |
| TH03_0296_S02 | osteosarcoma                         | RNA only target       | RNA only target                               | solid    |                         |                                |                                |        |       | new sample                              |                              |  |                      |
|               |                                      |                       |                                               |          | No druggable mutations  |                                | Receptor Tyrosine Kinase (RTK) |        | TEK   | MSH3                                    | Splice site 580-2a>g         |  | Foundation Medicine  |
| TH06_0645_S01 | sarcoma                              | No                    | Additional expression support for DNA finding | solid    |                         |                                |                                |        |       | new sample                              |                              |  |                      |
|               |                                      |                       |                                               |          | NF1 stop gained         | RAS/RAF/MEK                    |                                |        |       | NF1                                     | stop gained                  |  | BC POG DNA results   |
|               |                                      |                       |                                               |          |                         |                                | Receptor Tyrosine Kinase (RTK) | EGFR   |       | POTE1                                   | missense (benign/tolerated)  |  | BC POG DNA results   |
|               |                                      |                       |                                               |          |                         |                                | Receptor Tyrosine Kinase (RTK) | ERBB3  |       | MUC17                                   | missense                     |  | BC POG DNA results   |
|               |                                      |                       |                                               |          |                         |                                | Sonic Hedgehog (SHH)           | PTCH1  |       | HERC2                                   | deletion/frame shift         |  | BC POG DNA results   |
|               |                                      |                       |                                               |          |                         |                                |                                |        |       | NOTCH2                                  | deletion frame shift         |  | BC POG DNA results   |
|               |                                      |                       |                                               |          |                         |                                |                                |        |       | NCOA3                                   | two codon deletion           |  | BC POG DNA results   |
|               |                                      |                       |                                               |          |                         |                                |                                |        |       | MARCKS                                  | fusion with HERC2            |  | BC POG DNA results   |
|               |                                      |                       |                                               |          |                         |                                |                                |        |       | HERC2                                   | fusion with MARCKS           |  | BC POG DNA results   |
|               |                                      |                       |                                               |          |                         |                                |                                |        |       | ASH1L                                   | 65 aa insertion              |  | BC POG DNA results   |
| TH06_0646_S01 | neurofibroma                         | No                    | Additional expression support for DNA finding | solid    |                         |                                |                                |        |       | new sample                              |                              |  |                      |
|               |                                      |                       |                                               |          | NF1 loss                | RAS/RAF/MEK                    |                                |        |       | NF1                                     | loss                         |  | BC POG DNA results   |



|               |                                  |     |                                          |          |                        |                                |                                |                |                   |                              |             |                    |
|---------------|----------------------------------|-----|------------------------------------------|----------|------------------------|--------------------------------|--------------------------------|----------------|-------------------|------------------------------|-------------|--------------------|
|               |                                  |     |                                          |          |                        | Receptor Tyrosine Kinase (RTK) |                                | ERBB3          | ACSM5             | D400N                        |             | BC POG DNA results |
|               |                                  |     |                                          |          |                        | Sonic Hedgehog (SHH)           |                                | PTCH1          | PRSS3             | R255G                        |             | BC POG DNA results |
|               |                                  |     |                                          |          |                        |                                |                                |                | PDE4DIP inversion | inversion                    |             | BC POG DNA results |
|               |                                  |     |                                          |          |                        |                                |                                |                | SSH2              | loss                         |             | BC POG DNA results |
| TH06_0647_S01 | diffuse intrinsic pontine glioma | Yes | Prioritizing among multiple DNA findings | solid    |                        |                                |                                |                | new sample        |                              |             |                    |
|               |                                  |     |                                          |          | KDR amplification      | Receptor Tyrosine Kinase (RTK) |                                |                | GSX2              | amplification                |             | BC POG DNA results |
|               |                                  |     |                                          |          |                        |                                |                                |                | KDR               | amplification                |             | BC POG DNA results |
|               |                                  |     |                                          |          | PDGFRA amplification   | Receptor Tyrosine Kinase (RTK) | Receptor Tyrosine Kinase (RTK) | PDGFRA, PDGFRB | PDGFRA            | amplification                |             | BC POG DNA results |
|               |                                  |     |                                          |          |                        |                                |                                |                | BET1L             | homozygous loss              |             | BC POG DNA results |
|               |                                  |     |                                          |          |                        |                                |                                |                | ELOA3             | homozygous loss              |             | BC POG DNA results |
|               |                                  |     |                                          |          |                        |                                |                                |                | GRID1             | homozygous loss              |             | BC POG DNA results |
|               |                                  |     |                                          |          |                        |                                |                                |                | MYO5B             | homozygous loss              |             | BC POG DNA results |
|               |                                  |     |                                          |          |                        |                                |                                |                | PTPN13            | homozygous loss              |             | BC POG DNA results |
|               |                                  |     |                                          |          |                        |                                |                                |                | PTPN14            | gain                         |             | BC POG DNA results |
|               |                                  |     |                                          |          |                        |                                |                                |                | HRNR              | missense (present in normal) |             | BC POG DNA results |
|               |                                  |     |                                          |          |                        |                                |                                |                | H3F3A             | missense                     |             | BC POG DNA results |
|               |                                  |     |                                          |          |                        |                                |                                |                | RYR2              | missense                     |             | BC POG DNA results |
|               |                                  |     |                                          |          |                        |                                |                                |                | POMP              | missense                     |             | BC POG DNA results |
|               |                                  |     |                                          |          |                        |                                |                                |                | TP53              | copy loss                    |             | BC POG DNA results |
|               |                                  |     |                                          |          |                        |                                |                                |                | GOLGA6L2          | missense                     |             | BC POG DNA results |
|               |                                  |     |                                          |          |                        |                                |                                |                | TP53              | missense                     |             | BC POG DNA results |
|               |                                  |     |                                          |          |                        |                                |                                |                | KRTAP2-2          | missense                     |             | BC POG DNA results |
|               |                                  |     |                                          |          |                        |                                |                                |                | SCN4A             | missense                     |             | BC POG DNA results |
|               |                                  |     |                                          |          |                        |                                |                                |                | MAST3             | missense                     |             | BC POG DNA results |
|               |                                  |     |                                          |          |                        |                                |                                |                | TDRD12            | missense                     |             | BC POG DNA results |
|               |                                  |     |                                          |          |                        |                                |                                |                | TDRD12            | missense                     |             | BC POG DNA results |
|               |                                  |     |                                          |          |                        |                                |                                |                | UBE2F             | missense                     |             | BC POG DNA results |
|               |                                  |     |                                          |          |                        |                                |                                |                | MUC4              | missense                     |             | BC POG DNA results |
|               |                                  |     |                                          |          |                        |                                |                                |                | TMEM165           | missense                     |             | BC POG DNA results |
|               |                                  |     |                                          |          |                        |                                |                                |                | KHDRBS2           | missense                     |             | BC POG DNA results |
| TH06_0648_S01 | acute lymphoblastic leukemia     | Yes | Prioritizing among multiple DNA findings | leukemia |                        |                                |                                |                | new sample        |                              |             |                    |
|               |                                  |     |                                          |          |                        |                                |                                |                | IGHJ6             | translocation                |             | BC POG DNA results |
|               |                                  |     |                                          |          |                        |                                |                                |                | IGHM              | translocation                |             | BC POG DNA results |
|               |                                  |     |                                          |          |                        |                                |                                |                | KLF9              | translocation                |             | BC POG DNA results |
|               |                                  |     |                                          |          |                        |                                |                                |                | NCOR1             | translocation                |             | BC POG DNA results |
|               |                                  |     |                                          |          |                        |                                |                                |                | NUP160            | translocation                |             | BC POG DNA results |
|               |                                  |     |                                          |          |                        |                                |                                |                | SLC29A1           | translocation                |             | BC POG DNA results |
|               |                                  |     |                                          |          |                        |                                |                                |                | SUZ12             | translocation                |             | BC POG DNA results |
|               |                                  |     |                                          |          |                        |                                |                                |                | ZBTB44            | translocation                |             | BC POG DNA results |
|               |                                  |     |                                          |          |                        |                                |                                |                | ZCCHC7            | translocation                |             | BC POG DNA results |
|               |                                  |     |                                          |          |                        |                                |                                |                | ETV6              | deletion/duplication         |             | BC POG DNA results |
|               |                                  |     |                                          |          | CDKN2A homozygous loss | Cell Cycle                     | Cell cycle                     | CCND3, CDK6    | CDKN2A            | homozygous loss              |             | BC POG DNA results |
|               |                                  |     |                                          |          |                        |                                |                                |                | CNR2              | homozygous loss              |             | BC POG DNA results |
|               |                                  |     |                                          |          |                        |                                |                                |                | CNTNAP3B          | homozygous loss              |             | BC POG DNA results |
|               |                                  |     |                                          |          |                        |                                |                                |                | DMRTA1            | homozygous loss              |             | BC POG DNA results |
|               |                                  |     |                                          |          |                        |                                |                                |                | MTAP              | homozygous loss              |             | BC POG DNA results |
|               |                                  |     |                                          |          |                        |                                |                                |                | PGBD4P5           | homozygous loss              |             | BC POG DNA results |
|               |                                  |     |                                          |          |                        |                                |                                |                | PNRC2             | homozygous loss              |             | BC POG DNA results |
|               |                                  |     |                                          |          |                        |                                |                                |                | RBM17P3           | homozygous loss              |             | BC POG DNA results |
|               |                                  |     |                                          |          |                        |                                |                                |                | TJP2              | homozygous loss              |             | BC POG DNA results |
|               |                                  |     |                                          |          |                        |                                |                                |                | FLT3              | T227M                        |             | BC POG DNA results |
|               |                                  |     |                                          |          | RAS p.G12A             | RAS/RAF/MEK                    |                                |                | RAS               | G12A                         |             | BC POG DNA results |
|               |                                  |     |                                          |          | RAS p.G13D             | RAS/RAF/MEK                    |                                |                | RAS               | G13D                         |             | BC POG DNA results |
|               |                                  |     |                                          |          |                        |                                |                                |                | PCNT              | R3232L                       |             | BC POG DNA results |
|               |                                  |     |                                          |          |                        |                                |                                |                | PCNT              | R3232R                       |             | BC POG DNA results |
|               |                                  |     |                                          |          |                        |                                |                                |                | NTRK3             | Q185K                        |             | BC POG DNA results |
|               |                                  |     |                                          |          |                        |                                |                                |                | KIT V48L          | V48L – not characterized     |             | BC POG DNA results |
|               |                                  |     |                                          |          |                        |                                |                                |                | ZNF521            | V574I                        |             | BC POG DNA results |
|               |                                  |     |                                          |          |                        |                                |                                |                | IGF1R             | Y203F                        |             | BC POG DNA results |
|               |                                  |     |                                          |          |                        |                                | B-cell receptor signaling      | BTK            |                   |                              |             | BC POG DNA results |
|               |                                  |     |                                          |          |                        |                                | Receptor Tyrosine Kinase (RTK) | FLT3           |                   |                              |             | BC POG DNA results |
| TH06_0649_S01 | neuroblastoma                    | Yes | Prioritizing among multiple DNA findings | solid    |                        |                                |                                |                | new sample        |                              |             |                    |
|               |                                  |     |                                          |          | RPTOR amplification    | PI3K/AKT/mTOR                  | PI3K/AKT/mTOR                  |                | RPTOR             | CST3                         | duplication | BC POG DNA results |
|               |                                  |     |                                          |          |                        |                                |                                |                | RPTOR             | amplification                |             | BC POG DNA results |

**B. Comparative RNA-Seq analysis results for all 144 samples.**

| Sample ID     | Activated gene set lead        | Outlier support              | Pathway support                                                                                |
|---------------|--------------------------------|------------------------------|------------------------------------------------------------------------------------------------|
| TH01_0053_S01 | New sample                     | acute myeloid leukemia       |                                                                                                |
| TH01_0053_S01 | B-cell receptor signaling      | BTK (pc)                     | KEGG_CYTOKINE_CYTOKINE_RECEPTOR_INTERACTION (pc_up, 6/267)                                     |
| TH01_0053_S01 | Receptor Tyrosine Kinase (RTK) | FLT3 (pc)                    | REACTOME_IMMUNE_SYSTEM (pc_up, 11/933)                                                         |
| TH01_0054_S01 | New sample                     | acute lymphoblastic leukemia |                                                                                                |
| TH01_0054_S01 | Receptor Tyrosine Kinase (RTK) | FLT3 (pc)                    | KEGG_CYTOKINE_CYTOKINE_RECEPTOR_INTERACTION (comm_up, 4/267 and pc_up, 7/267 and pd_up, 5/267) |
| TH01_0054_S01 | Receptor Tyrosine Kinase (RTK) | FLT4 (pc)                    | HALLMARK_KRAS_SIGNALING_UP (pc_up, 5/200)                                                      |
| TH01_0054_S01 | B-cell receptor signaling      | MS4A1 (pc)                   | KEGG_HEMATOPOIETIC_CELL_LINEAGE (pc_up, 8/88)                                                  |
| TH01_0055_S01 | New sample                     | glioma                       |                                                                                                |
| TH01_0055_S01 | N/A                            | No druggable outliers        | N/A                                                                                            |
| TH01_0061_S01 | New sample                     | germ cell tumor              |                                                                                                |
| TH01_0061_S01 | N/A                            | No druggable outliers        | N/A                                                                                            |
| TH01_0062_S01 | New sample                     | acute lymphoblastic leukemia |                                                                                                |
| TH01_0062_S01 | B-cell receptor signaling      | BTK (pc)                     | BIOCARTA_BCR_PATHWAY (pc_up, 7/37)                                                             |
| TH01_0062_S01 | Cell Cycle                     | CCND3 (pc)                   | None                                                                                           |
| TH01_0062_S01 | JAK/STAT                       | IL6R (pc)                    | KEGG_JAK_STAT_SIGNALING_PATHWAY (pc_up, 10/155)                                                |
| TH01_0062_S01 | B-cell receptor signaling      | MS4A1 (pc)                   | KEGG_HEMATOPOIETIC_CELL_LINEAGE (pc_up, 11/88)                                                 |
| TH01_0062_S01 | PI3K/AKT/mTOR                  | PIK3CD (pc)                  | PID_PI3KCI_PATHWAY (pc_up, 7/49)                                                               |
| TH01_0062_S01 | PI3K/AKT/mTOR                  | PIK3R5 (pc)                  | PID_PI3KCI_PATHWAY (pc_up, 7/49)                                                               |
| TH01_0062_S01 | JAK/STAT                       | STAT5B (pc)                  | KEGG_JAK_STAT_SIGNALING_PATHWAY (pc_up, 10/155)                                                |
| TH01_0063_S01 | New sample                     | sarcoma                      |                                                                                                |
| TH01_0063_S01 | JAK/STAT                       | STAT2 (pc, pd)               | None                                                                                           |
| TH01_0064_S01 | New sample                     | lymphoma                     |                                                                                                |
| TH01_0064_S01 | B-cell receptor signaling      | MS4A1 (pc)                   | KEGG_HEMATOPOIETIC_CELL_LINEAGE (comm_up, 3/88 and pc_up, 11/88 and pd_up, 3/88)               |
| TH01_0069_S01 | New sample                     | sarcoma                      |                                                                                                |
| TH01_0069_S01 | N/A                            | No druggable outliers        | N/A                                                                                            |
| TH01_0120_S01 | New sample                     | acute myeloid leukemia       |                                                                                                |
| TH01_0120_S01 | Cell Cycle                     | CDK6 (pc)                    | PID_CMYB_PATHWAY (pc_up, 6/84)                                                                 |
| TH01_0120_S01 | Receptor Tyrosine Kinase (RTK) | KIT (pc)                     | PID_CMYB_PATHWAY (pc_up, 6/84)                                                                 |
| TH01_0121_S01 | New sample                     | acute lymphoblastic leukemia |                                                                                                |
| TH01_0121_S01 | JAK/STAT                       | IL6R (pc)                    | KEGG_JAK_STAT_SIGNALING_PATHWAY (pc_up, 13/155)                                                |
| TH01_0121_S01 | JAK/STAT                       | JAK3 (pc)                    | KEGG_JAK_STAT_SIGNALING_PATHWAY (pc_up, 13/155)                                                |
| TH01_0121_S01 | B-cell receptor signaling      | MS4A1 (pc)                   | KEGG_HEMATOPOIETIC_CELL_LINEAGE (comm_up, 7/88 and pc_up, 15/88 and pd_up, 8/88)               |
| TH01_0121_S01 | PI3K/AKT/mTOR                  | PIK3CD (pc)                  | KEGG_PHOSPHATIDYLINOSITOL_SIGNALING_SYSTEM (pc_up, 9/76)                                       |
| TH01_0121_S01 | PI3K/AKT/mTOR                  | PIK3CG (pc)                  | KEGG_PHOSPHATIDYLINOSITOL_SIGNALING_SYSTEM (pc_up, 9/76)                                       |
| TH01_0121_S01 | PI3K/AKT/mTOR                  | PIK3R5 (pc)                  | KEGG_PHOSPHATIDYLINOSITOL_SIGNALING_SYSTEM (pc_up, 9/76)                                       |
| TH01_0121_S01 | JAK/STAT                       | STAT5B (pc)                  | KEGG_JAK_STAT_SIGNALING_PATHWAY (pc_up, 13/155)                                                |
| TH01_0122_S01 | New sample                     | acute lymphoblastic leukemia |                                                                                                |
| TH01_0122_S01 | Cell Cycle                     | CDK6 (pc)                    | None                                                                                           |
| TH01_0122_S01 | B-cell receptor signaling      | MS4A1 (pc)                   | KEGG_HEMATOPOIETIC_CELL_LINEAGE (pc_up, 6/88)                                                  |
| TH01_0122_S01 | PI3K/AKT/mTOR                  | PIK3CD (pc)                  | KEGG_B_CELL_RECEPTOR_SIGNALING_PATHWAY (pc_up, 6/75)                                           |
| TH01_0122_S01 | PI3K/AKT/mTOR                  | PIK3CG (pc)                  | KEGG_B_CELL_RECEPTOR_SIGNALING_PATHWAY (pc_up, 6/75)                                           |
| TH01_0123_S01 | New sample                     | acute lymphoblastic leukemia |                                                                                                |
| TH01_0123_S01 | Receptor Tyrosine Kinase (RTK) | FLT3 (pc)                    | KEGG_HEMATOPOIETIC_CELL_LINEAGE (pc_up, 12/88)                                                 |
| TH01_0123_S01 | Receptor Tyrosine Kinase (RTK) | FLT4 (pc)                    | KEGG_HEMATOPOIETIC_CELL_LINEAGE (pc_up, 12/88)                                                 |
| TH01_0123_S01 | JAK/STAT                       | JAK3 (pc)                    | KEGG_JAK_STAT_SIGNALING_PATHWAY (pc_up, 8/155)                                                 |
| TH01_0123_S01 | B-cell receptor signaling      | MS4A1 (pc)                   | KEGG_HEMATOPOIETIC_CELL_LINEAGE (pc_up, 12/88)                                                 |
| TH01_0123_S01 | PI3K/AKT/mTOR                  | PIK3CD (pc)                  | PID_PI3KCI_PATHWAY (pc_up, 7/49)                                                               |
| TH01_0123_S01 | PI3K/AKT/mTOR                  | PIK3CG (pc)                  | PID_PI3KCI_PATHWAY (pc_up, 7/49)                                                               |
| TH01_0123_S01 | PI3K/AKT/mTOR                  | RPTOR (pc)                   | PID_PI3KCI_PATHWAY (pc_up, 7/49)                                                               |
| TH01_0124_S01 | New sample                     | acute lymphoblastic leukemia |                                                                                                |
| TH01_0124_S01 | Receptor Tyrosine Kinase (RTK) | FLT3 (pc)                    | KEGG_HEMATOPOIETIC_CELL_LINEAGE (pc_up, 4/88)                                                  |
| TH01_0124_S01 | PI3K/AKT/mTOR                  | PIK3CG (pc)                  | None                                                                                           |
| TH01_0125_S01 | New sample                     | acute lymphoblastic leukemia |                                                                                                |
| TH01_0125_S01 | B-cell receptor signaling      | BTK (pc)                     | KEGG_B_CELL_RECEPTOR_SIGNALING_PATHWAY (pc_up, 4/75)                                           |
| TH01_0125_S01 | Cell Cycle                     | CDK6 (pc)                    | PID_CMYB_PATHWAY (pc_up, 6/84)                                                                 |
| TH01_0125_S01 | Receptor Tyrosine Kinase (RTK) | FLT3 (pc)                    | KEGG_HEMATOPOIETIC_CELL_LINEAGE (pc_up, 4/88)                                                  |
| TH01_0125_S01 | PI3K/AKT/mTOR                  | PIK3CG (pc)                  | KEGG_B_CELL_RECEPTOR_SIGNALING_PATHWAY (pc_up, 4/75)                                           |
| TH01_0126_S01 | New sample                     | acute lymphoblastic leukemia |                                                                                                |
| TH01_0126_S01 | N/A                            | No druggable outliers        | N/A                                                                                            |
| TH01_0127_S01 | New sample                     | acute lymphoblastic leukemia |                                                                                                |
| TH01_0127_S01 | B-cell receptor signaling      | BTK (pc)                     | KEGG_B_CELL_RECEPTOR_SIGNALING_PATHWAY (pc_up, 7/75)                                           |
| TH01_0127_S01 | Receptor Tyrosine Kinase (RTK) | FLT3 (pc)                    | KEGG_HEMATOPOIETIC_CELL_LINEAGE (pc_up, 5/88)                                                  |
| TH01_0127_S01 | BCL2/MDM2                      | MDM2 (pc)                    | None                                                                                           |
| TH01_0127_S01 | PI3K/AKT/mTOR                  | PIK3CG (pc)                  | KEGG_B_CELL_RECEPTOR_SIGNALING_PATHWAY (pc_up, 7/75)                                           |

| Sample ID     | Activated gene set lead        | Outlier support                  | Pathway support                                                     |
|---------------|--------------------------------|----------------------------------|---------------------------------------------------------------------|
| TH01_0128_S01 | New sample                     | acute lymphoblastic leukemia     |                                                                     |
| TH01_0128_S01 | JAK/STAT                       | IL6R (pc)                        | KEGG_JAK_STAT_SIGNALING_PATHWAY (pc_up, 7/155)                      |
| TH01_0128_S01 | PI3K/AKT/mTOR                  | PIK3CD (pc)                      | PID_PI3KCI_PATHWAY (pc_up, 4/49)                                    |
| TH01_0128_S01 | PI3K/AKT/mTOR                  | PIK3CG (pc)                      | PID_PI3KCI_PATHWAY (pc_up, 4/49)                                    |
| TH01_0128_S01 | PI3K/AKT/mTOR                  | PIK3R5 (pc)                      | PID_PI3KCI_PATHWAY (pc_up, 4/49)                                    |
| TH01_0129_S01 | New sample                     | acute lymphoblastic leukemia     |                                                                     |
| TH01_0129_S01 | B-cell receptor signaling      | MS4A1 (pc)                       | KEGG_HEMATOPOIETIC_CELL_LINEAGE (pc_up, 6/88)                       |
| TH01_0129_S01 | PI3K/AKT/mTOR                  | PIK3CG (pc)                      | KEGG_B_CELL_RECEPTOR_SIGNALING_PATHWAY (pc_up, 6/75)                |
| TH01_0130_S01 | New sample                     | acute lymphoblastic leukemia     |                                                                     |
| TH01_0130_S01 | Cell Cycle                     | CDK6 (pc)                        | None                                                                |
| TH01_0130_S01 | Receptor Tyrosine Kinase (RTK) | FLT3 (pc)                        | KEGG_HEMATOPOIETIC_CELL_LINEAGE (pc_up, 6/88)                       |
| TH01_0130_S01 | B-cell receptor signaling      | MS4A1 (pc)                       | KEGG_HEMATOPOIETIC_CELL_LINEAGE (pc_up, 6/88)                       |
| TH01_0130_S01 | PI3K/AKT/mTOR                  | PIK3CG (pc)                      | KEGG_B_CELL_RECEPTOR_SIGNALING_PATHWAY (pc_up, 6/75)                |
| TH01_0131_S01 | New sample                     | acute lymphoblastic leukemia     |                                                                     |
| TH01_0131_S01 | B-cell receptor signaling      | BTK (pc)                         | ST_B_CELL_ANTIGEN_RECEPTOR (pc_up, 3/40)                            |
| TH01_0131_S01 | Cell Cycle                     | CDK6 (pc)                        | PID_CMYB_PATHWAY (pc_up, 4/84)                                      |
| TH01_0131_S01 | Receptor Tyrosine Kinase (RTK) | FLT3 (pc)                        | KEGG_HEMATOPOIETIC_CELL_LINEAGE (pc_up, 7/88)                       |
| TH01_0131_S01 | Receptor Tyrosine Kinase (RTK) | FLT4 (pc)                        | BIOCARTA_VEGF_PATHWAY (pc_up, 3/29)                                 |
| TH01_0131_S01 | PI3K/AKT/mTOR                  | PIK3CG (pc)                      | KEGG_B_CELL_RECEPTOR_SIGNALING_PATHWAY (pc_up, 9/75)                |
| TH01_0132_S01 | New sample                     | acute myeloid leukemia           |                                                                     |
| TH01_0132_S01 | B-cell receptor signaling      | BTK (pc)                         | KEGG_B_CELL_RECEPTOR_SIGNALING_PATHWAY (pc_up, 4/75)                |
| TH01_0132_S01 | Cell Cycle                     | CDK6 (pc)                        | PID_CMYB_PATHWAY (pc_up, 6/84)                                      |
| TH01_0132_S01 | Receptor Tyrosine Kinase (RTK) | FLT3 (pc)                        | None                                                                |
| TH01_0132_S01 | PI3K/AKT/mTOR                  | PIK3CG (pc)                      | KEGG_B_CELL_RECEPTOR_SIGNALING_PATHWAY (pc_up, 4/75)                |
| TH01_0133_S01 | New sample                     | acute lymphoblastic leukemia     |                                                                     |
| TH01_0133_S01 | Receptor Tyrosine Kinase (RTK) | FLT3 (pc)                        | None                                                                |
| TH01_0134_S01 | New sample                     | acute lymphoblastic leukemia     |                                                                     |
| TH01_0134_S01 | Cell Cycle                     | CDK6 (pc)                        | PID_CMYB_PATHWAY (pc_up, 9/84)                                      |
| TH01_0134_S01 | Receptor Tyrosine Kinase (RTK) | ERBB2 (pd)                       | None                                                                |
| TH02_0074_S01 | New sample                     | glioblastoma multiforme          |                                                                     |
| TH02_0074_S01 | PI3K/AKT/mTOR                  | AKT3 (pc, pd)                    | PID_PI3KCI_AKT_PATHWAY (comm_up, 3/35)                              |
| TH02_0074_S01 | Cell Cycle                     | CCND2 (pc, pd)                   | KEGG_CELL_CYCLE (comm_up, 6/128 and pc_up, 6/128 and pd_up, 13/128) |
| TH02_0074_S01 | Heat Shock Proteins            | HSP90AA1 (pc, pd)                | None                                                                |
| TH02_0074_S01 | Heat Shock Proteins            | HSP90AB1 (pd)                    | None                                                                |
| TH02_0074_S01 | Heat Shock Proteins            | HSP90B1 (pd)                     | HALLMARK_UNFOLDED_PROTEIN_RESPONSE (pd_up, 13/113)                  |
| TH02_0074_S01 | JAK/STAT                       | JAK1 (pd)                        | KEGG_JAK_STAT_SIGNALING_PATHWAY (comm_up, 6/155 and pc_up, 6/155)   |
| TH02_0074_S01 | PI3K/AKT/mTOR                  | PIK3C3 (pd)                      | None                                                                |
| TH02_0074_S01 | PI3K/AKT/mTOR                  | PIK3R3 (pc, pd)                  | HALLMARK_MTORC1_SIGNALING (pd_up, 21/200)                           |
| TH02_0075_S01 | New sample                     | glioblastoma multiforme          |                                                                     |
| TH02_0075_S01 | PI3K/AKT/mTOR                  | PIK3R3 (pc, pd)                  | None                                                                |
| TH02_0076_S01 | New sample                     | glioblastoma multiforme          |                                                                     |
| TH02_0076_S01 | Cell Cycle                     | CDK4 (pd)                        | REACTOME_CELL_CYCLE (comm_up, 8/421 and pd_up, 20/421)              |
| TH02_0076_S01 | Heat Shock Proteins            | HSP90AA1 (pd)                    | None                                                                |
| TH02_0076_S01 | Receptor Tyrosine Kinase (RTK) | MET (pd)                         | None                                                                |
| TH02_0077_S01 | New sample                     | glioma                           |                                                                     |
| TH02_0077_S01 | PI3K/AKT/mTOR                  | AKT3 (pd)                        | REACTOME_PI3K_AKT_ACTIVATION (pc_up, 3/38)                          |
| TH02_0077_S01 | Receptor Tyrosine Kinase (RTK) | PDGFRA (pc)                      | BIOCARTA_PDGF_PATHWAY (pc_up, 3/32)                                 |
| TH02_0077_S01 | PI3K/AKT/mTOR                  | PIK3R1 (pc)                      | REACTOME_PI3K_AKT_ACTIVATION (pc_up, 3/38)                          |
| TH02_0077_S01 | Sonic Hedgehog (SHH)           | PTCH1 (pc)                       | None                                                                |
| TH02_0078_S01 | New sample                     | glioma                           |                                                                     |
| TH02_0078_S01 | PI3K/AKT/mTOR                  | AKT3 (pd)                        | KEGG_GLIOMA (comm_up, 3/65 and pc_up, 5/65 and pd_up, 6/65)         |
| TH02_0078_S01 | RAS/RAF/MEK                    | BRAF (pd)                        | KEGG_GLIOMA (comm_up, 3/65 and pc_up, 5/65 and pd_up, 6/65)         |
| TH02_0078_S01 | Cell Cycle                     | CDK6 (pc, pd)                    | KEGG_GLIOMA (comm_up, 3/65 and pc_up, 5/65 and pd_up, 6/65)         |
| TH02_0078_S01 | Receptor Tyrosine Kinase (RTK) | PDGFRA (pc, pd)                  | KEGG_GLIOMA (comm_up, 3/65 and pc_up, 5/65 and pd_up, 6/65)         |
| TH02_0078_S01 | PI3K/AKT/mTOR                  | PIK3R1 (pc)                      | KEGG_GLIOMA (comm_up, 3/65 and pc_up, 5/65 and pd_up, 6/65)         |
| TH02_0079_S01 | New sample                     | glioma                           |                                                                     |
| TH02_0079_S01 | N/A                            | No druggable outliers            | N/A                                                                 |
| TH02_0080_S01 | New sample                     | glioma                           |                                                                     |
| TH02_0080_S01 | N/A                            | No druggable outliers            | N/A                                                                 |
| TH02_0081_S01 | New sample                     | glioblastoma multiforme          |                                                                     |
| TH02_0081_S01 | PI3K/AKT/mTOR                  | AKT3 (pd)                        | REACTOME_PI_3K_CASCADE (pc_up, 5/56 and pd_up, 6/56)                |
| TH02_0081_S01 | BCL2/MDM2                      | BCL6 (pc)                        | None                                                                |
| TH02_0081_S01 | Cell Cycle                     | CDK4 (pc, pd)                    | REACTOME_CELL_CYCLE (pd_up, 17/421)                                 |
| TH02_0081_S01 | PI3K/AKT/mTOR                  | PIK3C3 (pc, pd)                  | None                                                                |
| TH02_0081_S01 | PI3K/AKT/mTOR                  | PIK3R1 (pc)                      | REACTOME_PI_3K_CASCADE (pc_up, 5/56 and pd_up, 6/56)                |
| TH02_0082_S01 | New sample                     | diffuse intrinsic pontine glioma |                                                                     |



| Sample ID     | Activated gene set lead        | Outlier support                           | Pathway support                                                                     |
|---------------|--------------------------------|-------------------------------------------|-------------------------------------------------------------------------------------|
| TH02_0082_S01 | N/A                            | No druggable outliers                     | N/A                                                                                 |
| TH02_0083_S01 | New sample                     | diffuse intrinsic pontine glioma          |                                                                                     |
| TH02_0083_S01 | Receptor Tyrosine Kinase (RTK) | PDGFRA (pc)                               | KEGG_MAPK_SIGNALING_PATHWAY (pc_up, 6/267)                                          |
| TH02_0084_S01 | New sample                     | diffuse intrinsic pontine glioma          |                                                                                     |
| TH02_0084_S01 | N/A                            | No druggable outliers                     | N/A                                                                                 |
| TH02_0085_S01 | New sample                     | diffuse intrinsic pontine glioma          |                                                                                     |
| TH02_0085_S01 | Receptor Tyrosine Kinase (RTK) | PDGFRA (pc)                               | None                                                                                |
| TH02_0086_S01 | New sample                     | diffuse intrinsic pontine glioma          |                                                                                     |
| TH02_0086_S01 | Sonic Hedgehog (SHH)           | PTCH1 (pc)                                | None                                                                                |
| TH02_0087_S01 | New sample                     | diffuse intrinsic pontine glioma          |                                                                                     |
| TH02_0087_S01 | JAK/STAT                       | JAK1 (pd)                                 | REACTOME_INTERFERON_SIGNALING (pd_up, 4/159)                                        |
| TH02_0087_S02 | New sample                     | diffuse intrinsic pontine glioma          |                                                                                     |
| TH02_0087_S02 | N/A                            | No druggable outliers                     | N/A                                                                                 |
| TH02_0088_S01 | New sample                     | diffuse intrinsic pontine glioma          |                                                                                     |
| TH02_0088_S01 | N/A                            | No druggable outliers                     | N/A                                                                                 |
| TH02_0089_S01 | New sample                     | diffuse intrinsic pontine glioma          |                                                                                     |
| TH02_0089_S01 | N/A                            | No druggable outliers                     | N/A                                                                                 |
| TH02_0090_S01 | New sample                     | diffuse intrinsic pontine glioma          |                                                                                     |
| TH02_0090_S01 | Sonic Hedgehog (SHH)           | PTCH1 (pc)                                | None                                                                                |
| TH02_0091_S01 | New sample                     | diffuse intrinsic pontine glioma          |                                                                                     |
| TH02_0091_S01 | Receptor Tyrosine Kinase (RTK) | ALK (pc, pd)                              | None                                                                                |
| TH02_0091_S01 | Receptor Tyrosine Kinase (RTK) | CSF1R (pc)                                | KEGG_HEMATOPOIETIC_CELL_LINEAGE (pc_up, 4/88 and pd_up, 3/88)                       |
| TH02_0092_S01 | New sample                     | diffuse intrinsic pontine glioma          |                                                                                     |
| TH02_0092_S01 | RAS/RAF/MEK                    | MAP2K1 (pc, pd)                           | KEGG_MAPK_SIGNALING_PATHWAY (comm_up, 5/267 and pd_up, 8/267)                       |
| TH02_0093_S01 | New sample                     | diffuse intrinsic pontine glioma          |                                                                                     |
| TH02_0093_S01 | N/A                            | No druggable outliers                     | N/A                                                                                 |
| TH02_0094_S01 | New sample                     | diffuse intrinsic pontine glioma          |                                                                                     |
| TH02_0094_S01 | Receptor Tyrosine Kinase (RTK) | MET (pd)                                  | None                                                                                |
| TH02_0095_S01 | New sample                     | diffuse intrinsic pontine glioma          |                                                                                     |
| TH02_0095_S01 | Sonic Hedgehog (SHH)           | PTCH1 (pc)                                | None                                                                                |
| TH02_0096_S01 | New sample                     | diffuse intrinsic pontine glioma          |                                                                                     |
| TH02_0096_S01 | N/A                            | No druggable outliers                     | N/A                                                                                 |
| TH03_0003_S01 | New sample                     | sarcoma                                   |                                                                                     |
| TH03_0003_S01 | N/A                            | No druggable outliers                     | N/A                                                                                 |
| TH03_0003_S03 | New sample                     | sarcoma                                   |                                                                                     |
| TH03_0003_S03 | N/A                            | No druggable outliers                     | N/A                                                                                 |
| TH03_0003_S04 | New sample                     | sarcoma                                   |                                                                                     |
| TH03_0003_S04 | N/A                            | No druggable outliers                     | N/A                                                                                 |
| TH03_0004_S02 | New sample                     | hepatoblastoma                            |                                                                                     |
| TH03_0004_S02 | N/A                            | No druggable outliers                     | N/A                                                                                 |
| TH03_0004_S03 | New sample                     | hepatoblastoma                            |                                                                                     |
| TH03_0004_S03 | N/A                            | No druggable outliers                     | N/A                                                                                 |
| TH03_0004_S04 | New sample                     | hepatoblastoma                            |                                                                                     |
| TH03_0004_S04 | Heat Shock Proteins            | HSP90B1 (pd)                              | HALLMARK_UNFOLDED_PROTEIN_RESPONSE (pd_up, 5/113)                                   |
| TH03_0004_S04 | JAK/STAT                       | IL6 (pc, pd)                              | HALLMARK_IL6_JAK_STAT3_SIGNALING (comm_up, 5/87 and pc_up, 5/87 and pd_up, 6/87)    |
| TH03_0005_S01 | New sample                     | nasopharyngeal carcinoma                  |                                                                                     |
| TH03_0005_S01 | N/A                            | No druggable outliers                     | N/A                                                                                 |
| TH03_0006_S01 | New sample                     | rhabdomyosarcoma                          |                                                                                     |
| TH03_0006_S01 | Heat Shock Proteins            | HSP90B1 (NA)                              | None                                                                                |
| TH03_0006_S03 | New sample                     | rhabdomyosarcoma                          |                                                                                     |
| TH03_0006_S03 | N/A                            | No druggable outliers                     | N/A                                                                                 |
| TH03_0008_S01 | New sample                     | neuroblastoma                             |                                                                                     |
| TH03_0008_S01 | PI3K/AKT/mTOR                  | RPTOR (pc, pd)                            | HALLMARK_PI3K_AKT_MTOR_SIGNALING (comm_up, 5/105 and pc_up, 7/105 and pd_up, 9/105) |
| TH03_0008_S01 | JAK/STAT                       | STAT5 (NA)                                | REACTOME_IMMUNE_SYSTEM (pc_up, 22/933 and pd_up, 31/933)                            |
| TH03_0010_S01 | New sample                     | acute leukemia of ambiguous lineage, CNS1 |                                                                                     |
| TH03_0010_S01 | B-cell receptor signaling      | BTK (pc)                                  | SIG_BCR_SIGNALING_PATHWAY (pc_up, 4/46)                                             |
| TH03_0010_S01 | Cell Cycle                     | CDK6 (pc)                                 | PID_CMYB_PATHWAY (pc_up, 6/84)                                                      |
| TH03_0010_S01 | Receptor Tyrosine Kinase (RTK) | FLT3 (pc)                                 | None                                                                                |
| TH03_0010_S01 | JAK/STAT                       | STAT5A (pc)                               | PID_IL4_2PATHWAY (pc_up, 5/65)                                                      |
| TH03_0010_S02 | New sample                     | acute leukemia of ambiguous lineage, CNS1 |                                                                                     |
| TH03_0010_S02 | B-cell receptor signaling      | BTK (pc)                                  | REACTOME_SIGNALING_BY_THE_B_CELL_RECEPTOR_BCR (pd_up, 6/126)                        |
| TH03_0010_S02 | BCL2/MDM2                      | MDM2 (pd)                                 | HALLMARK_P53_PATHWAY (pd_up, 5/200)                                                 |
| TH03_0010_S02 | JAK/STAT                       | STAT5A (pc)                               | BIOCARTA_IL3_PATHWAY (pc_up, 2/15)                                                  |
| TH03_0011_S01 | New sample                     | acute lymphoblastic leukemia              |                                                                                     |

| Sample ID     | Activated gene set lead        | Outlier support                        | Pathway support                                                               |
|---------------|--------------------------------|----------------------------------------|-------------------------------------------------------------------------------|
| TH03_0011_S01 | B-cell receptor signaling      | BTK (pc)                               | REACTOME_SIGNALING_BY_THE_B_CELL_RECEPTOR_BCR (pc_up, 10/126)                 |
| TH03_0011_S01 | Cell Cycle                     | CCND3 (pc)                             | BIOCARTA_CELLCYCLE_PATHWAY (pc_up, 3/23)                                      |
| TH03_0011_S01 | Receptor Tyrosine Kinase (RTK) | FLT3 (pc)                              | KEGG_HEMATOPOIETIC_CELL_LINEAGE (pc_up, 7/88)                                 |
| TH03_0011_S01 | JAK/STAT                       | IL6R (pc)                              | KEGG_JAK_STAT_SIGNALING_PATHWAY (pc_up, 6/155)                                |
| TH03_0012_S01 | New sample                     | wilms tumor                            |                                                                               |
| TH03_0012_S01 | PI3K/AKT/mTOR                  | PIK3R1 (pd)                            | None                                                                          |
| TH03_0012_S02 | New sample                     | wilms tumor                            |                                                                               |
| TH03_0012_S02 | PI3K/AKT/mTOR                  | PIK3R1 (pd)                            | None                                                                          |
| TH03_0012_S02 | JAK/STAT                       | STAT3 (pd)                             | HALLMARK_IL6_JAK_STAT3_SIGNALING (pd_up, 7/87)                                |
| TH03_0013_S01 | New sample                     | acute lymphoblastic leukemia           |                                                                               |
| TH03_0013_S01 | B-cell receptor signaling      | BTK (pc)                               | REACTOME_SIGNALING_BY_THE_B_CELL_RECEPTOR_BCR (pc_up, 9/126)                  |
| TH03_0013_S01 | Cell Cycle                     | CCND3 (pc)                             | None                                                                          |
| TH03_0013_S01 | Cell Cycle                     | CDK6 (pc)                              | PID_CMYB_PATHWAY (pc_up, 8/84)                                                |
| TH03_0013_S01 | PI3K/AKT/mTOR                  | PIK3CD (pc)                            | KEGG_PHOSPHATIDYLINOSITOL_SIGNALING_SYSTEM (pc_up, 4/76)                      |
| TH03_0013_S01 | PI3K/AKT/mTOR                  | PIK3R5 (pc)                            | KEGG_PHOSPHATIDYLINOSITOL_SIGNALING_SYSTEM (pc_up, 4/76)                      |
| TH03_0013_S02 | New sample                     | acute lymphoblastic leukemia           |                                                                               |
| TH03_0013_S02 | Cell Cycle                     | CDK6 (pc)                              | PID_CMYB_PATHWAY (pc_up, 9/84)                                                |
| TH03_0013_S02 | PI3K/AKT/mTOR                  | PIK3CD (pc)                            | KEGG_PHOSPHATIDYLINOSITOL_SIGNALING_SYSTEM (pc_up, 4/76)                      |
| TH03_0013_S02 | PI3K/AKT/mTOR                  | PIK3R5 (pc)                            | KEGG_PHOSPHATIDYLINOSITOL_SIGNALING_SYSTEM (pc_up, 4/76)                      |
| TH03_0014_S01 | New sample                     | sarcoma                                |                                                                               |
| TH03_0014_S01 | JAK/STAT                       | JAK1 (pc, pd)                          | None                                                                          |
| TH03_0015_S01 | New sample                     | neuroblastoma                          |                                                                               |
| TH03_0015_S01 | Cell Cycle                     | CDK6 (pc)                              | REACTOME_CELL_CYCLE (pd_up, 7/421)                                            |
| TH03_0016_S01 | New sample                     | atypical teratoid/rhabdoid tumor       |                                                                               |
| TH03_0016_S01 | Receptor Tyrosine Kinase (RTK) | ERBB2 (pd)                             | REACTOME_PI3K_EVENTS_IN_ERBB2_SIGNALING (pd_up, 4/44)                         |
| TH03_0016_S01 | Receptor Tyrosine Kinase (RTK) | FGFR1 (pd)                             | PID_FGF_PATHWAY (pd_up, 4/55)                                                 |
| TH03_0016_S01 | JAK/STAT                       | IL6 (pc)                               | PID_IL6_7_PATHWAY (pc_up, 3/47 and pd_up, 5/47)                               |
| TH03_0017_S01 | New sample                     | hepatoblastoma                         |                                                                               |
| TH03_0017_S01 | BCL2/MDM2                      | MDM2 (pc, pd)                          | KEGG_P53_SIGNALING_PATHWAY (pd_up, 4/69)                                      |
| TH03_0018_S01 | New sample                     | sarcoma                                |                                                                               |
| TH03_0018_S01 | Receptor Tyrosine Kinase (RTK) | FLT4 (pc, pd)                          | HALLMARK_KRAS_SIGNALING_UP (comm_up, 5/200 and pc_up, 6/200 and pd_up, 6/200) |
| TH03_0018_S02 | New sample                     | sarcoma                                |                                                                               |
| TH03_0018_S02 | N/A                            | No druggable outliers                  | N/A                                                                           |
| TH03_0019_S01 | New sample                     | fibrolamellar hepatocellular carcinoma |                                                                               |
| TH03_0019_S01 | Receptor Tyrosine Kinase (RTK) | FLT1 (pd)                              | PID_VEGF_VEGFR_PATHWAY (pd_up, 2/10)                                          |
| TH03_0019_S01 | Receptor Tyrosine Kinase (RTK) | KDR (pd)                               | PID_VEGF_VEGFR_PATHWAY (pd_up, 2/10)                                          |
| TH03_0020_S01 | New sample                     | medulloblastoma                        |                                                                               |
| TH03_0020_S01 | Sonic Hedgehog (SHH)           | PTCH1 (pc)                             | PID_HEDGEHOG_GLI_PATHWAY (pc_up, 3/48)                                        |
| TH03_0022_S01 | New sample                     | osteosarcoma                           |                                                                               |
| TH03_0022_S01 | Receptor Tyrosine Kinase (RTK) | FGFR1 (pc)                             | PID_FGF_PATHWAY (pc_up, 4/55)                                                 |
| TH03_0024_S01 | New sample                     | adrenocortical carcinoma               |                                                                               |
| TH03_0024_S01 | N/A                            | No druggable outliers                  | N/A                                                                           |
| TH03_0025_S02 | New sample                     | osteosarcoma                           |                                                                               |
| TH03_0025_S02 | N/A                            | No druggable outliers                  | N/A                                                                           |
| TH03_0027_S01 | New sample                     | osteosarcoma                           |                                                                               |
| TH03_0027_S01 | N/A                            | No druggable outliers                  | N/A                                                                           |
| TH03_0029_S01 | New sample                     | osteosarcoma                           |                                                                               |
| TH03_0029_S01 | N/A                            | No druggable outliers                  | N/A                                                                           |
| TH03_0038_S01 | New sample                     | osteosarcoma                           |                                                                               |
| TH03_0038_S01 | N/A                            | No druggable outliers                  | N/A                                                                           |
| TH03_0103_S01 | New sample                     | rhabdomyosarcoma                       |                                                                               |
| TH03_0103_S01 | RAS/RAF/MEK                    | MAP2K2 (pc, pd)                        | BIOCARTA_BARR_MAPK_PATHWAY (pd_up, 2/12)                                      |
| TH03_0104_S01 | New sample                     | hepatoblastoma                         |                                                                               |
| TH03_0104_S01 | N/A                            | No druggable outliers                  | N/A                                                                           |
| TH03_0105_S01 | New sample                     | rhabdomyosarcoma                       |                                                                               |
| TH03_0105_S01 | N/A                            | No druggable outliers                  | N/A                                                                           |
| TH03_0106_S01 | New sample                     | sarcoma                                |                                                                               |
| TH03_0106_S01 | JAK/STAT                       | JAK1 (pc)                              | None                                                                          |
| TH03_0107_S01 | New sample                     | hepatoblastoma                         |                                                                               |
| TH03_0107_S01 | N/A                            | No druggable outliers                  | N/A                                                                           |
| TH03_0112_S01 | New sample                     | sarcoma                                |                                                                               |
| TH03_0112_S01 | Receptor Tyrosine Kinase (RTK) | ERBB2 (pd)                             | REACTOME_PI3K_EVENTS_IN_ERBB2_SIGNALING (pd_up, 3/44)                         |
| TH03_0112_S01 | PI3K/AKT/mTOR                  | MLST8 (pd)                             | REACTOME_PI3K_AKT_ACTIVATION (pd_up, 3/38)                                    |
| TH03_0112_S02 | New sample                     | sarcoma                                |                                                                               |
| TH03_0112_S02 | Receptor Tyrosine Kinase (RTK) | ERBB2 (pd)                             | None                                                                          |
| TH03_0112_S02 | Sonic Hedgehog (SHH)           | GLI1 (pc)                              | PID_HEDGEHOG_GLI_PATHWAY (pc_up, 3/48)                                        |

| Sample ID     | Activated gene set lead        | Outlier support                        | Pathway support                                                                  |
|---------------|--------------------------------|----------------------------------------|----------------------------------------------------------------------------------|
| TH03_0112_S02 | Sonic Hedgehog (SHH)           | PTCH1 (pc)                             | PID_HEDGEHOG_GLI_PATHWAY (pc_up, 3/48)                                           |
| TH03_0113_S01 | New sample                     | myoepithelial carcinoma of the liver   |                                                                                  |
| TH03_0113_S01 | Receptor Tyrosine Kinase (RTK) | FGFR1 (pc, pd)                         | PID_FGF_PATHWAY (pd_up, 3/55)                                                    |
| TH03_0113_S02 | New sample                     | myoepithelial carcinoma of the liver   |                                                                                  |
| TH03_0113_S02 | Receptor Tyrosine Kinase (RTK) | FGFR1 (pc, pd)                         | REACTOME_FGFR_LIGAND_BINDING_AND_ACTIVATION (comm_up, 2/22 and pc_up, 2/22)      |
| TH03_0114_S01 | New sample                     | fibrolamellar hepatocellular carcinoma |                                                                                  |
| TH03_0114_S01 | N/A                            | No druggable outliers                  | N/A                                                                              |
| TH03_0115_S01 | New sample                     | teratoma                               |                                                                                  |
| TH03_0115_S01 | N/A                            | No druggable outliers                  | N/A                                                                              |
| TH03_0116_S01 | New sample                     | hepatoblastoma                         |                                                                                  |
| TH03_0116_S01 | N/A                            | No druggable outliers                  | N/A                                                                              |
| TH03_0117_S01 | New sample                     | glioma                                 |                                                                                  |
| TH03_0117_S01 | Heat Shock Proteins            | HSP90B1 (pd)                           | None                                                                             |
| TH03_0117_S01 | Receptor Tyrosine Kinase (RTK) | PDGFRB (pd)                            | PID_PDGFRB_PATHWAY (pd_up, 9/129)                                                |
| TH03_0118_S01 | New sample                     | acute myeloid leukemia                 |                                                                                  |
| TH03_0118_S01 | B-cell receptor signaling      | BTK (pc)                               | KEGG_B_CELL_RECEPTOR_SIGNALING_PATHWAY (pc_up, 4/75)                             |
| TH03_0118_S01 | Receptor Tyrosine Kinase (RTK) | FLT3 (pc)                              | KEGG_HEMATOPOIETIC_CELL_LINEAGE (pc_up, 6/88)                                    |
| TH03_0139_S01 | New sample                     | osteosarcoma                           |                                                                                  |
| TH03_0139_S01 | Cell Cycle                     | CCNE1 (pc, pd)                         | REACTOME_CELL_CYCLE (pd_up, 8/421)                                               |
| TH03_0140_S01 | New sample                     | osteosarcoma                           |                                                                                  |
| TH03_0140_S01 | N/A                            | No druggable outliers                  | N/A                                                                              |
| TH03_0141_S01 | New sample                     | osteosarcoma                           |                                                                                  |
| TH03_0141_S01 | Cell Cycle                     | CCND3 (pc, pd)                         | REACTOME_CELL_CYCLE (pc_up, 6/421 and pd_up, 5/421)                              |
| TH03_0141_S01 | Cell Cycle                     | CDK4 (pc, pd)                          | REACTOME_CELL_CYCLE (pc_up, 6/421 and pd_up, 5/421)                              |
| TH03_0141_S01 | BCL2/MDM2                      | MDM2 (pd)                              | BIOCARTA_P53_PATHWAY (pd_up, 2/16)                                               |
| TH03_0141_S01 | Sonic Hedgehog (SHH)           | PTCH1 (pc)                             | None                                                                             |
| TH03_0143_S01 | New sample                     | osteosarcoma                           |                                                                                  |
| TH03_0143_S01 | JAK/STAT                       | IL6 (pc, pd)                           | BIOCARTA_IL6_PATHWAY (pd_up, 2/22)                                               |
| TH03_0143_S02 | New sample                     | osteosarcoma                           |                                                                                  |
| TH03_0143_S02 | N/A                            | No druggable outliers                  | N/A                                                                              |
| TH03_0144_S01 | New sample                     | wilms tumor                            |                                                                                  |
| TH03_0144_S01 | PI3K/AKT/mTOR                  | MLST8 (pd)                             | KEGG_MTOR_SIGNALING_PATHWAY (pd_up, 3/52)                                        |
| TH03_0144_S01 | JAK/STAT                       | STAT1 (pd)                             | REACTOME_CYTOKINE_SIGNALING_IN_IMMUNE_SYSTEM (pd_up, 11/270)                     |
| TH03_0146_S01 | New sample                     | sarcoma                                |                                                                                  |
| TH03_0146_S01 | Cell Cycle                     | CCNE1 (pc)                             | None                                                                             |
| TH03_0146_S01 | Receptor Tyrosine Kinase (RTK) | FLT4 (pc, pd)                          | None                                                                             |
| TH03_0148_S01 | New sample                     | lymphoma                               |                                                                                  |
| TH03_0148_S01 | B-cell receptor signaling      | MS4A1 (pc, pd)                         | KEGG_HEMATOPOIETIC_CELL_LINEAGE (comm_up, 8/88 and pc_up, 8/88 and pd_up, 8/88)  |
| TH03_0149_S01 | New sample                     | acute myeloid leukemia                 |                                                                                  |
| TH03_0149_S01 | Receptor Tyrosine Kinase (RTK) | FLT3 (pc)                              | KEGG_HEMATOPOIETIC_CELL_LINEAGE (pc_up, 8/88)                                    |
| TH03_0156_S01 | New sample                     | sarcoma                                |                                                                                  |
| TH03_0156_S01 | N/A                            | No druggable outliers                  | N/A                                                                              |
| TH03_0159_S01 | New sample                     | osteosarcoma                           |                                                                                  |
| TH03_0159_S01 | N/A                            | No druggable outliers                  | N/A                                                                              |
| TH03_0159_S02 | New sample                     | osteosarcoma                           |                                                                                  |
| TH03_0159_S02 | N/A                            | No druggable outliers                  | N/A                                                                              |
| TH03_0285_S01 | New sample                     | juvenile myelomonocytic leukemia       |                                                                                  |
| TH03_0285_S01 | B-cell receptor signaling      | BTK (pc)                               | REACTOME_SIGNALING_BY_THE_B_CELL_RECEPTOR_BCR (pc_up, 9/126)                     |
| TH03_0285_S01 | Receptor Tyrosine Kinase (RTK) | CSF1R (pc)                             | KEGG_CYTOKINE_CYTOKINE_RECEPTOR_INTERACTION (pc_up, 17/267 and pd_up, 6/267)     |
| TH03_0285_S01 | JAK/STAT                       | IL6 (pd)                               | KEGG_CYTOKINE_CYTOKINE_RECEPTOR_INTERACTION (pc_up, 17/267 and pd_up, 6/267)     |
| TH03_0285_S01 | B-cell receptor signaling      | MS4A1 (pc)                             | KEGG_HEMATOPOIETIC_CELL_LINEAGE (comm_up, 3/88 and pc_up, 15/88 and pd_up, 4/88) |
| TH03_0286_S01 | New sample                     | hepatocellular carcinoma               |                                                                                  |
| TH03_0286_S01 | Receptor Tyrosine Kinase (RTK) | PDGFRB (pd)                            | KEGG_MAPK_SIGNALING_PATHWAY (pd_up, 4/267)                                       |
| TH03_0287_S01 | New sample                     | neuroblastoma                          |                                                                                  |
| TH03_0287_S01 | PI3K/AKT/mTOR                  | AKT3 (pd)                              | PID_PI3KCI_AKT_PATHWAY (pd_up, 3/35)                                             |
| TH03_0288_S01 | New sample                     | neuroblastoma                          |                                                                                  |
| TH03_0288_S01 | Receptor Tyrosine Kinase (RTK) | ALK (pc)                               | None                                                                             |
| TH03_0288_S01 | Cell Cycle                     | CDK6 (pc)                              | BIOCARTA_CELLCYCLE_PATHWAY (pc_up, 3/23)                                         |
| TH03_0288_S01 | B-cell receptor signaling      | MS4A1 (pc, pd)                         | None                                                                             |
| TH03_0289_S01 | New sample                     | acute lymphoblastic leukemia           |                                                                                  |
| TH03_0289_S01 | B-cell receptor signaling      | BTK (pc)                               | KEGG_B_CELL_RECEPTOR_SIGNALING_PATHWAY (pc_up, 11/75)                            |
| TH03_0289_S01 | Cell Cycle                     | CCND3 (pc)                             | REACTOME_CELL_CYCLE (pc_up, 10/421)                                              |
| TH03_0289_S01 | Receptor Tyrosine Kinase (RTK) | FLT3 (pc)                              | KEGG_HEMATOPOIETIC_CELL_LINEAGE (pc_up, 11/88)                                   |
| TH03_0289_S01 | BCL2/MDM2                      | MDM2 (pc)                              | HALLMARK_P53_PATHWAY (pc_up, 6/200)                                              |
| TH03_0289_S01 | B-cell receptor signaling      | MS4A1 (pc)                             | KEGG_HEMATOPOIETIC_CELL_LINEAGE (pc_up, 11/88)                                   |
| TH03_0289_S01 | PI3K/AKT/mTOR                  | PIK3C2B (pc)                           | KEGG_PHOSPHATIDYLINOSITOL_SIGNALING_SYSTEM (pc_up, 5/76)                         |



| Sample ID     | Activated gene set lead        | Outlier support                  | Pathway support                                                      |
|---------------|--------------------------------|----------------------------------|----------------------------------------------------------------------|
| TH03_0289_S01 | PI3K/AKT/mTOR                  | PIK3CD (pc)                      | KEGG_PHOSPHATIDYLINOSITOL_SIGNALING_SYSTEM (pc_up, 5/76)             |
| TH03_0290_S01 | New sample                     | glioma                           |                                                                      |
| TH03_0290_S01 | JAK/STAT                       | IL6 (pd)                         | HALLMARK_INFLAMMATORY_RESPONSE (pd_up, 5/200)                        |
| TH03_0291_S01 | New sample                     | ependymoma                       |                                                                      |
| TH03_0291_S01 | Receptor Tyrosine Kinase (RTK) | ERBB2 (pd)                       | None                                                                 |
| TH03_0296_S01 | New sample                     | osteosarcoma                     |                                                                      |
| TH03_0296_S01 | N/A                            | No druggable outliers            | N/A                                                                  |
| TH03_0296_S02 | New sample                     | osteosarcoma                     |                                                                      |
| TH03_0296_S02 | Receptor Tyrosine Kinase (RTK) | TEK (pc, pd)                     | None                                                                 |
| TH06_0284_S01 | New sample                     | neuroblastoma                    |                                                                      |
| TH06_0284_S01 | Receptor Tyrosine Kinase (RTK) | ERBB3 (pd)                       | None                                                                 |
| TH06_0610_S01 | New sample                     | sarcoma                          |                                                                      |
| TH06_0610_S01 | Receptor Tyrosine Kinase (RTK) | ALK (pc, pd)                     |                                                                      |
| TH06_0610_S01 | Cell Cycle                     | CCND1 (pd)                       | PID_CMYB_PATHWAY (pd_up, 5/84)                                       |
| TH06_0610_S01 | Receptor Tyrosine Kinase (RTK) | FGFR1 (pd)                       | PID_FGF_PATHWAY (pd_up, 5/55)                                        |
| TH06_0610_S01 | JAK/STAT                       | IL6 (pc, pd)                     | BIOCARTA_IL10_PATHWAY (pd_up, 3/17)                                  |
| TH06_0610_S01 | JAK/STAT                       | JAK1 (pd)                        | BIOCARTA_IL10_PATHWAY (pd_up, 3/17)                                  |
| TH06_0610_S01 | JAK/STAT                       | STAT5B (pd)                      | BIOCARTA_IL10_PATHWAY (pd_up, 3/17)                                  |
| TH06_0611_S01 | New sample                     | craniopharyngioma                |                                                                      |
| TH06_0611_S01 | Sonic Hedgehog (SHH)           | PTCH1 (pc)                       | BIOCARTA_SHH_PATHWAY (pc_up, 3/16)                                   |
| TH06_0612_S01 | New sample                     | thyroid carcinoma                |                                                                      |
| TH06_0612_S01 | N/A                            | No druggable outliers            | N/A                                                                  |
| TH06_0613_S01 | New sample                     | atypical teratoid/rhabdoid tumor |                                                                      |
| TH06_0613_S01 | Cell Cycle                     | CCND3 (pd)                       | HALLMARK_P53_PATHWAY (pd_up, 6/200)                                  |
| TH06_0613_S01 | RAS/RAF/MEK                    | MAP2K1 (pc, pd)                  | BIOCARTA_ERK_PATHWAY (comm_up, 2/28 and pc_up, 2/28 and pd_up, 3/28) |
| TH06_0613_S01 | RAS/RAF/MEK                    | MAP2K2 (pc, pd)                  | BIOCARTA_ERK_PATHWAY (comm_up, 2/28 and pc_up, 2/28 and pd_up, 3/28) |
| TH06_0613_S02 | New sample                     | atypical teratoid/rhabdoid tumor |                                                                      |
| TH06_0613_S02 | Receptor Tyrosine Kinase (RTK) | PDGFRA (pd)                      | None                                                                 |
| TH06_0615_S01 | New sample                     | sarcoma                          |                                                                      |
| TH06_0615_S01 | Receptor Tyrosine Kinase (RTK) | KIT (pc)                         | None                                                                 |
| TH06_0616_S01 | New sample                     | glioblastoma multiforme          |                                                                      |
| TH06_0616_S01 | PI3K/AKT/mTOR                  | AKT1 (pd)                        | HALLMARK_PI3K_AKT_MTOR_SIGNALING (pd_up, 4/105)                      |
| TH06_0616_S01 | DNA repair                     | PARP1 (pd)                       | None                                                                 |
| TH06_0616_S01 | PI3K/AKT/mTOR                  | PIK3R2 (pc, pd)                  | REACTOME_PI3K_AKT_ACTIVATION (pd_up, 3/38)                           |
| TH06_0617_S01 | New sample                     | ependymoma                       |                                                                      |
| TH06_0617_S01 | PI3K/AKT/mTOR                  | PIK3R1 (pc, pd)                  | None                                                                 |
| TH06_0618_S01 | New sample                     | NUT midline carcinoma            |                                                                      |
| TH06_0618_S01 | N/A                            | No druggable outliers            | N/A                                                                  |
| TH06_0619_S01 | New sample                     | angiosarcoma                     |                                                                      |
| TH06_0619_S01 | Receptor Tyrosine Kinase (RTK) | FGFR1 (pd)                       | REACTOME_SIGNALING_BY_FGFR_IN_DISEASE (pd_up, 5/127)                 |
| TH06_0619_S01 | Receptor Tyrosine Kinase (RTK) | TEK (pc)                         | PID_SHP2_PATHWAY (pc_up, 4/58)                                       |
| TH06_0620_S01 | New sample                     | gliomatosis cerebri              |                                                                      |
| TH06_0620_S01 | N/A                            | No druggable outliers            | N/A                                                                  |
| TH06_0621_S01 | New sample                     | osteosarcoma                     |                                                                      |
| TH06_0621_S01 | PI3K/AKT/mTOR                  | MLST8 (pd)                       | REACTOME_MTORC1_MEDIATED_SIGNALLING (pd_up, 2/11)                    |
| TH06_0622_S01 | New sample                     | neuroblastoma                    |                                                                      |
| TH06_0622_S01 | N/A                            | No druggable outliers            | N/A                                                                  |
| TH06_0623_S01 | New sample                     | rhabdomyosarcoma                 |                                                                      |
| TH06_0623_S01 | Receptor Tyrosine Kinase (RTK) | ALK (pc)                         | None                                                                 |
| TH06_0623_S01 | Heat Shock Proteins            | HSP90AA1 (pc, pd)                | None                                                                 |
| TH06_0624_S01 | New sample                     | lung adenocarcinoma              |                                                                      |
| TH06_0624_S01 | N/A                            | No druggable outliers            | N/A                                                                  |
| TH06_0625_S01 | New sample                     | fibromatosis                     |                                                                      |
| TH06_0625_S01 | N/A                            | No druggable outliers            | N/A                                                                  |
| TH06_0626_S01 | New sample                     | fibromatosis                     |                                                                      |
| TH06_0626_S01 | N/A                            | No druggable outliers            | N/A                                                                  |
| TH06_0627_S01 | New sample                     | glioblastoma multiforme          |                                                                      |
| TH06_0627_S01 | PI3K/AKT/mTOR                  | AKT1 (pd)                        | PID_PI3K_AKT_PATHWAY (pd_up, 3/35)                                   |
| TH06_0627_S01 | BCL2/MDM2                      | BCL6 (pc)                        | None                                                                 |
| TH06_0627_S01 | Receptor Tyrosine Kinase (RTK) | CSF1R (pc)                       | None                                                                 |
| TH06_0627_S01 | JAK/STAT                       | STAT1 (pd)                       | KEGG_JAK_STAT_SIGNALING_PATHWAY (pd_up, 5/155)                       |
| TH06_0627_S01 | JAK/STAT                       | STAT2 (pc, pd)                   | KEGG_JAK_STAT_SIGNALING_PATHWAY (pd_up, 5/155)                       |
| TH06_0628_S01 | New sample                     | neuroblastoma                    |                                                                      |
| TH06_0628_S01 | Receptor Tyrosine Kinase (RTK) | CSF1R (pd)                       | PID_CMYB_PATHWAY (pd_up, 7/84)                                       |
| TH06_0629_S01 | New sample                     | neurofibromatosis type 1         |                                                                      |
| TH06_0629_S01 | Receptor Tyrosine Kinase (RTK) | ERBB3 (pd)                       | REACTOME_SIGNALING_BY_ERBB2 (pd_up, 5/101)                           |

| Sample ID     | Activated gene set lead        | Outlier support                  | Pathway support                                                                   |
|---------------|--------------------------------|----------------------------------|-----------------------------------------------------------------------------------|
| TH06_0630_S01 | New sample                     | osteosarcoma                     |                                                                                   |
| TH06_0630_S01 | PI3K/AKT/mTOR                  | MLST8 (pd)                       | KEGG_MTOR_SIGNALING_PATHWAY (pd_up, 8/52)                                         |
| TH06_0630_S01 | PI3K/AKT/mTOR                  | PIK3R1 (pd)                      | KEGG_MTOR_SIGNALING_PATHWAY (pd_up, 8/52)                                         |
| TH06_0630_S01 | JAK/STAT                       | STAT2 (pd)                       | REACTOME_CYTOKINE_SIGNALING_IN_IMMUNE_SYSTEM (pd_up, 12/270)                      |
| TH06_0630_S01 | PI3K/AKT/mTOR                  | TSC2 (pc, pd)                    | KEGG_MTOR_SIGNALING_PATHWAY (pd_up, 8/52)                                         |
| TH06_0631_S01 | New sample                     | thyroid carcinoma                |                                                                                   |
| TH06_0631_S01 | Receptor Tyrosine Kinase (RTK) | CSF1R (pd)                       | KEGG_HEMATOPOIETIC_CELL_LINEAGE (pd_up, 5/88)                                     |
| TH06_0631_S01 | JAK/STAT                       | STAT2 (pd)                       | REACTOME_CYTOKINE_SIGNALING_IN_IMMUNE_SYSTEM (pd_up, 13/270)                      |
| TH06_0631_S01 | PI3K/AKT/mTOR                  | TSC2 (pd)                        | HALLMARK_PI3K_AKT_MTOR_SIGNALING (pd_up, 6/105)                                   |
| TH06_0632_S01 | New sample                     | wilms tumor                      |                                                                                   |
| TH06_0632_S01 | BCL2/MDM2                      | BCL6 (pc, pd)                    | PID_P53_DOWNSTREAM_PATHWAY (pd_up, 10/137)                                        |
| TH06_0632_S01 | PI3K/AKT/mTOR                  | MLST8 (pd)                       | KEGG_MTOR_SIGNALING_PATHWAY (pd_up, 6/52)                                         |
| TH06_0632_S01 | Receptor Tyrosine Kinase (RTK) | PDGFRB (pd)                      | KEGG_MTOR_SIGNALING_PATHWAY (pd_up, 6/52)                                         |
| TH06_0632_S01 | PI3K/AKT/mTOR                  | PIK3R1 (pd)                      | KEGG_MTOR_SIGNALING_PATHWAY (pd_up, 6/52)                                         |
| TH06_0632_S01 | JAK/STAT                       | STAT3 (pd)                       | HALLMARK_INTERFERON_GAMMA_RESPONSE (pd_up, 15/200)                                |
| TH06_0632_S01 | PI3K/AKT/mTOR                  | TSC2 (pc)                        | KEGG_MTOR_SIGNALING_PATHWAY (pd_up, 6/52)                                         |
| TH06_0633_S01 | New sample                     | neurofibroma                     |                                                                                   |
| TH06_0633_S01 | BCL2/MDM2                      | BCL6 (pd)                        | PID_P53_DOWNSTREAM_PATHWAY (pd_up, 14/137)                                        |
| TH06_0633_S01 | Receptor Tyrosine Kinase (RTK) | EGFR (pd)                        | KEGG_MAPK_SIGNALING_PATHWAY (comm_up, 11/267 and pc_up, 11/267 and pd_up, 23/267) |
| TH06_0633_S01 | Receptor Tyrosine Kinase (RTK) | ERBB2 (pd)                       | REACTOME_SIGNALING_BY_ERBB2 (comm_up, 4/101 and pc_up, 4/101 and pd_up, 14/101)   |
| TH06_0633_S01 | Receptor Tyrosine Kinase (RTK) | FGFR1 (pd)                       | KEGG_MAPK_SIGNALING_PATHWAY (comm_up, 11/267 and pc_up, 11/267 and pd_up, 23/267) |
| TH06_0633_S01 | Sonic Hedgehog (SHH)           | GLI1 (pc, pd)                    | PID_HEDGEHOG_GLI_PATHWAY (comm_up, 3/48 and pc_up, 3/48 and pd_up, 7/48)          |
| TH06_0633_S01 | Receptor Tyrosine Kinase (RTK) | PDGFRB (pc, pd)                  | PID_PDGFBRB_PATHWAY (comm_up, 6/129 and pc_up, 6/129 and pd_up, 14/129)           |
| TH06_0633_S01 | PI3K/AKT/mTOR                  | PIK3R1 (pd)                      | REACTOME_PI3K_EVENTS_IN_ERBB2_SIGNALING (pd_up, 7/44)                             |
| TH06_0633_S01 | Sonic Hedgehog (SHH)           | PTCH1 (pc, pd)                   | PID_HEDGEHOG_GLI_PATHWAY (comm_up, 3/48 and pc_up, 3/48 and pd_up, 7/48)          |
| TH06_0633_S01 | RAS/RAF/MEK                    | RAF1 (pd)                        | KEGG_MAPK_SIGNALING_PATHWAY (comm_up, 11/267 and pc_up, 11/267 and pd_up, 23/267) |
| TH06_0633_S01 | JAK/STAT                       | STAT3 (pd)                       | REACTOME_IMMUNE_SYSTEM (pd_up, 40/933)                                            |
| TH06_0633_S01 | JAK/STAT                       | STAT5B (pd)                      | REACTOME_IMMUNE_SYSTEM (pd_up, 40/933)                                            |
| TH06_0633_S01 | PI3K/AKT/mTOR                  | TSC2 (pd)                        | REACTOME_PI3K_EVENTS_IN_ERBB2_SIGNALING (pd_up, 7/44)                             |
| TH06_0634_S01 | New sample                     | osteosarcoma                     |                                                                                   |
| TH06_0634_S01 | Cell Cycle                     | CDK4 (pd)                        | None                                                                              |
| TH06_0645_S01 | New sample                     | sarcoma                          |                                                                                   |
| TH06_0645_S01 | Receptor Tyrosine Kinase (RTK) | EGFR (pd)                        | REACTOME_SIGNALING_BY_ERBB4 (pd_up, 4/90)                                         |
| TH06_0645_S01 | Receptor Tyrosine Kinase (RTK) | ERBB3 (pd)                       | REACTOME_SIGNALING_BY_ERBB4 (pd_up, 4/90)                                         |
| TH06_0645_S01 | Sonic Hedgehog (SHH)           | PTCH1 (pc, pd)                   | KEGG_BASAL_CELL_CARCINOMA (comm_up, 3/55 and pc_up, 3/55 and pd_up, 3/55)         |
| TH06_0646_S01 | New sample                     | neurofibroma                     |                                                                                   |
| TH06_0646_S01 | Receptor Tyrosine Kinase (RTK) | ERBB3 (pd)                       | None                                                                              |
| TH06_0646_S01 | Sonic Hedgehog (SHH)           | PTCH1 (pc, pd)                   | None                                                                              |
| TH06_0647_S01 | New sample                     | diffuse intrinsic pontine glioma |                                                                                   |
| TH06_0647_S01 | Receptor Tyrosine Kinase (RTK) | PDGFRA (pc)                      | None                                                                              |
| TH06_0647_S01 | Receptor Tyrosine Kinase (RTK) | PDGFRB (pd)                      | None                                                                              |
| TH06_0648_S01 | New sample                     | acute lymphoblastic leukemia     |                                                                                   |
| TH06_0648_S01 | B-cell receptor signaling      | BTK (pc)                         | REACTOME_SIGNALING_BY_THE_B_CELL_RECEPTOR_BCR (pc_up, 11/126)                     |
| TH06_0648_S01 | Cell Cycle                     | CCND3 (pc)                       | REACTOME_G1_PHASE (pc_up, 3/38)                                                   |
| TH06_0648_S01 | Cell Cycle                     | CDK6 (pc)                        | REACTOME_G1_PHASE (pc_up, 3/38)                                                   |
| TH06_0648_S01 | Receptor Tyrosine Kinase (RTK) | FLT3 (pc)                        | KEGG_HEMATOPOIETIC_CELL_LINEAGE (pc_up, 7/88)                                     |
| TH06_0649_S01 | New sample                     | neuroblastoma                    |                                                                                   |
| TH06_0649_S01 | PI3K/AKT/mTOR                  | RPTOR (pc, pd)                   | None                                                                              |



a.

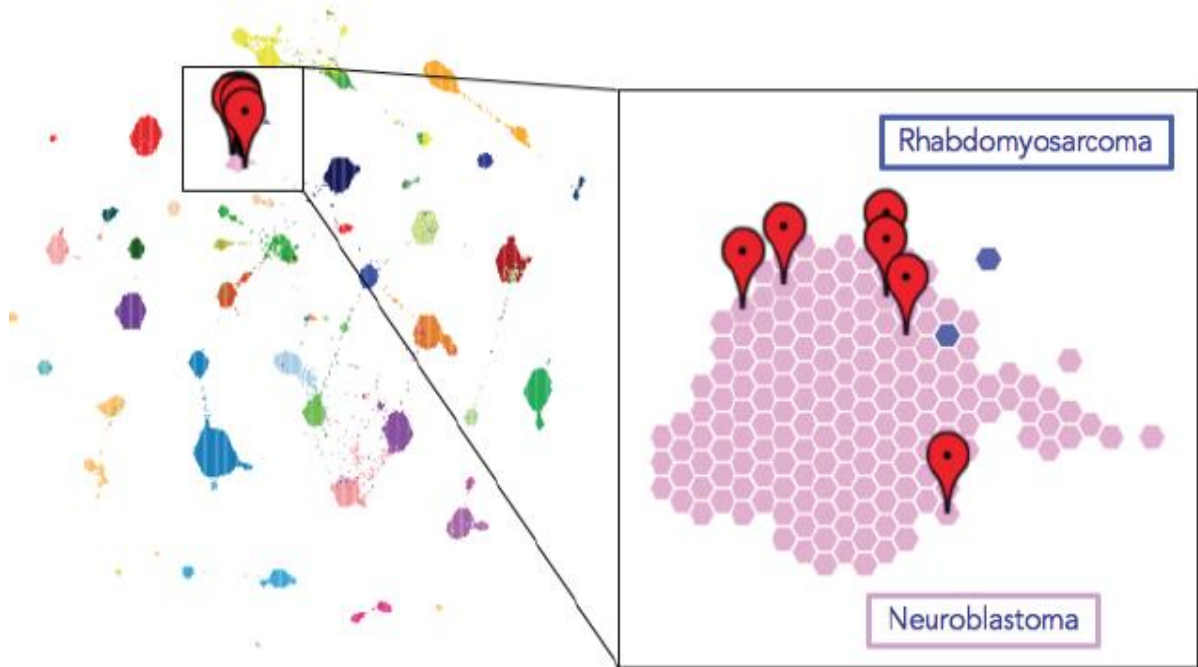

b.

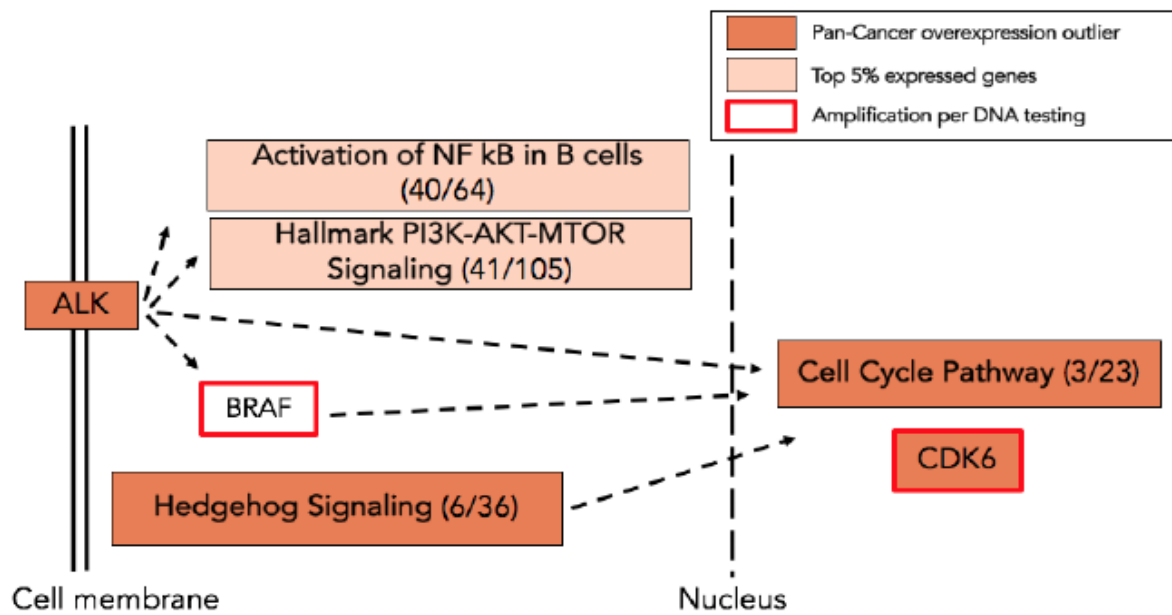

C.

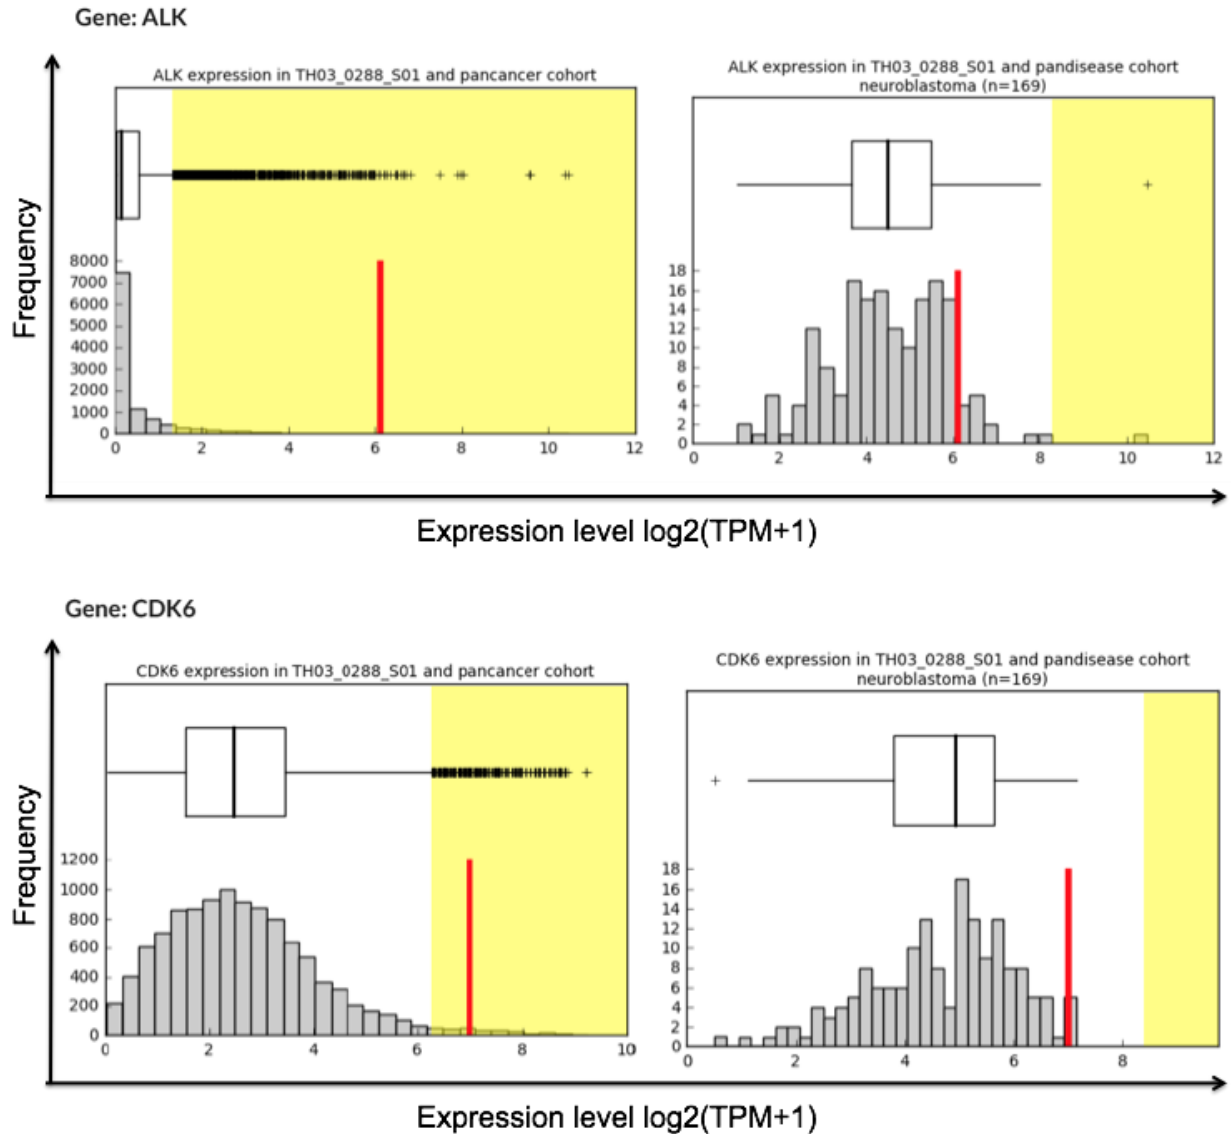

**eFigure 2. Treehouse analysis of sample TH03\_0288\_S01.** A. Gene expression similarity analysis, visualized using TumorMap (eMethods), reveals that most correlated samples are neuroblastomas. B. Summary of outlier analysis and gene set overlap analysis of lists of outlier genes. ALK and CDK6 are pan-cancer over-expression outliers; CDK6 and BRAF are amplified in the tumor. The Hedgehog Signaling and Cell Cycle Pathway annotations are significantly enriched among outlier gene lists. C. Gene expression levels of ALK (top) and CDK6 (bottom) in the whole compendium (left) or all neuroblastoma samples (right). The outlier range is denoted in yellow, and the expression level in sample TH03\_0288\_S01 is indicated with a red bar.

## eReferences

1. Vivian J, Rao AA, Nothaft FA, et al. Toil enables reproducible, open source, big biomedical data analyses. *Nat Biotechnol.* 2017;35(4):314-316. doi:10.1038/nbt.3772
2. Harris PA, Taylor R, Thielke R, Payne J, Gonzalez N, Conde JG. Research electronic data capture (REDCap)--a metadata-driven methodology and workflow process for providing translational research informatics support. *J Biomed Inform.* 2009;42(2):377-381. doi:10.1016/j.jbi.2008.08.010
3. Newton Y, Novak AM, Swatloski T, et al. TumorMap: Exploring the Molecular Similarities of Cancer Samples in an Interactive Portal. *Cancer Res.* 2017;77(21):e111-e114. doi:10.1158/0008-5472.CAN-17-0580
